# Supplementary material
Source: publisher figshare collection journal article supplement (https://acs.figshare.com/ndownloader/files/5335909)
Supplement: Supplementary file 1 [file 5335909]

data_Compound3
 
_audit_creation_method            SHELXL-97
_chemical_name_systematic
;
 ?
;
_chemical_name_common             ?
_chemical_melting_point           ?
_chemical_compound_source          'local laboratory'
_chemical_formula_moiety  'C10 H21 B11 O2, C2 H6 O S'
_chemical_formula_sum   'C12 H27 B11 O3 S'
_chemical_formula_weight          370.31
 
loop_
 _atom_type_symbol
 _atom_type_description
 _atom_type_scat_dispersion_real
 _atom_type_scat_dispersion_imag
 _atom_type_scat_source
 'C'  'C'   0.0033   0.0016
 'International Tables Vol C Tables 4.2.6.8 and 6.1.1.4'
 'H'  'H'   0.0000   0.0000
 'International Tables Vol C Tables 4.2.6.8 and 6.1.1.4'
 'B'  'B'   0.0013   0.0007
 'International Tables Vol C Tables 4.2.6.8 and 6.1.1.4'
 'O'  'O'   0.0106   0.0060
 'International Tables Vol C Tables 4.2.6.8 and 6.1.1.4'
 'S'  'S'   0.1246   0.1234
 'International Tables Vol C Tables 4.2.6.8 and 6.1.1.4'
 
_symmetry_space_group_name_H-M 'P 21/c        '
_symmetry_space_group_name_Hall    '-P 2ybc'   
_symmetry_cell_setting 'Monoclinic'
 
loop_
 _symmetry_equiv_pos_as_xyz
 'x, y, z'
 '-x, y+1/2, -z+1/2'
 '-x, -y, -z'
 'x, -y-1/2, z-1/2'
 
_cell_length_a                    19.767(2)
_cell_length_b                    7.6608(10)
_cell_length_c                    14.602(2)
_cell_angle_alpha                 90
_cell_angle_beta                  111.660(6)
_cell_angle_gamma                 90
_cell_volume                      2055.1(4)
_cell_formula_units_Z             4
_cell_measurement_temperature     90
_cell_measurement_reflns_used     5522
_cell_measurement_theta_min        2.5
_cell_measurement_theta_max        28.7
 
_exptl_crystal_description        plate
_exptl_crystal_colour             colorless
_exptl_crystal_size_max           0.35
_exptl_crystal_size_mid           0.27
_exptl_crystal_size_min           0.03
_exptl_crystal_density_meas       ?
_exptl_crystal_density_diffrn     1.197
_exptl_crystal_density_method     'not measured'
_exptl_crystal_F_000              776
_exptl_absorpt_coefficient_mu     0.167
_exptl_absorpt_correction_type    'multi-scan' 
_exptl_absorpt_correction_T_min   0.954
_exptl_absorpt_correction_T_max   0.995
_exptl_absorpt_process_details  'Denzo & Scalepack (Otwinowski & Minor, 1997)'
 
_exptl_special_details
;
 ?
;
 
_diffrn_ambient_temperature       90
_diffrn_radiation_wavelength      0.71073
_diffrn_radiation_type            MoK\a
_diffrn_radiation_source          'fine-focus sealed tube'
_diffrn_radiation_monochromator   graphite
_diffrn_measurement_device_type  'Nonius KappaCCD (with Oxford Cryostream)'
_diffrn_measurement_method              ' \w scans with \k offsets'
_diffrn_detector_area_resol_mean  ?
_diffrn_standards_number          0
_diffrn_standards_interval_count  ?
_diffrn_standards_interval_time   ?
_diffrn_standards_decay_%         <2
_diffrn_reflns_number             33530
_diffrn_reflns_av_R_equivalents   0.038
_diffrn_reflns_av_sigmaI/netI     0.0514
_diffrn_reflns_limit_h_min        -26
_diffrn_reflns_limit_h_max        26
_diffrn_reflns_limit_k_min        -10
_diffrn_reflns_limit_k_max        10
_diffrn_reflns_limit_l_min        -19
_diffrn_reflns_limit_l_max        19
_diffrn_reflns_theta_min          2.7
_diffrn_reflns_theta_max          28.7
_reflns_number_total              5295
_reflns_number_gt                 3856
_reflns_threshold_expression      I>2\s(I)
 
_computing_data_collection        'COLLECT (Nonius, 2000)' 
_computing_cell_refinement
                           'Denzo and Scalepack (Otwinowski & Minor, 1997)'
_computing_data_reduction
                           'Denzo and Scalepack (Otwinowski & Minor, 1997)'
_computing_structure_solution     'SIR97 (Altomare  et al., 1999)'
_computing_structure_refinement         'SHELXL-97 (Sheldrick, 1997)'
_computing_molecular_graphics           'Ortep-3 for Windows (Farrugia, 1997)'
_computing_publication_material    'SHELXL-97 (Sheldrick, 1997)' 
 
_refine_special_details
;
 Refinement of F^2^ against ALL reflections.  The weighted R-factor wR and
 goodness of fit S are based on F^2^, conventional R-factors R are based
 on F, with F set to zero for negative F^2^. The threshold expression of
 F^2^ > 2sigma(F^2^) is used only for calculating R-factors(gt) etc. and is
 not relevant to the choice of reflections for refinement.  R-factors based
 on F^2^ are statistically about twice as large as those based on F, and R-
 factors based on ALL data will be even larger.
;
 
_refine_ls_structure_factor_coef  Fsqd
_refine_ls_matrix_type            full
_refine_ls_weighting_scheme       calc
_refine_ls_weighting_details
 'calc w=1/[\s^2^(Fo^2^)+(0.0542P)^2^+0.6141P] where P=(Fo^2^+2Fc^2^)/3'
_atom_sites_solution_primary      direct
_atom_sites_solution_secondary    difmap
_atom_sites_solution_hydrogens    geom
_refine_ls_hydrogen_treatment     mixed
_refine_ls_extinction_method      none
_refine_ls_extinction_coef        ?
_refine_ls_number_reflns          5295
_refine_ls_number_parameters      254
_refine_ls_number_restraints      0
_refine_ls_R_factor_all           0.071
_refine_ls_R_factor_gt            0.044
_refine_ls_wR_factor_ref          0.115
_refine_ls_wR_factor_gt           0.105
_refine_ls_goodness_of_fit_ref    1.034
_refine_ls_restrained_S_all       1.034
_refine_ls_shift/su_max           0.001
_refine_ls_shift/su_mean          0.000
 
loop_
 _atom_site_label
 _atom_site_type_symbol
 _atom_site_fract_x
 _atom_site_fract_y
 _atom_site_fract_z
 _atom_site_U_iso_or_equiv
 _atom_site_adp_type
 _atom_site_occupancy
 _atom_site_symmetry_multiplicity
 _atom_site_calc_flag
 _atom_site_refinement_flags
 _atom_site_disorder_assembly
 _atom_site_disorder_group
O1 O 0.39712(6) 0.74612(16) 0.74145(9) 0.0239(3) Uani 1 1 d . . .
H1O H 0.4348(11) 0.751(3) 0.7964(16) 0.036 Uiso 1 1 d . . .
O2 O 0.47649(6) 0.56974(18) 0.69497(9) 0.0309(3) Uani 1 1 d . . .
H2O H 0.4793(12) 0.490(3) 0.6542(16) 0.046 Uiso 1 1 d . . .
C1 C 0.15097(8) 0.43439(19) 0.24406(10) 0.0126(3) Uani 1 1 d . . .
C2 C 0.13281(8) 0.39208(19) 0.12461(11) 0.0144(3) Uani 1 1 d . . .
C3 C 0.14261(9) 0.5356(2) 0.05913(11) 0.0200(3) Uani 1 1 d . . .
H31 H 0.1153 0.6392 0.0646 0.030 Uiso 1 1 calc R . .
H32 H 0.1245 0.4955 -0.0094 0.030 Uiso 1 1 calc R . .
H33 H 0.1944 0.5649 0.0799 0.030 Uiso 1 1 calc R . .
C4 C 0.17463(8) 0.62075(19) 0.27952(11) 0.0165(3) Uani 1 1 d . . .
H41 H 0.1904 0.6800 0.2305 0.020 Uiso 1 1 calc R . .
H42 H 0.1321 0.6851 0.2826 0.020 Uiso 1 1 calc R . .
C5 C 0.23558(8) 0.63086(18) 0.37903(11) 0.0141(3) Uani 1 1 d . . .
C6 C 0.22000(8) 0.63845(19) 0.46456(11) 0.0151(3) Uani 1 1 d . . .
H6 H 0.1708 0.6388 0.4600 0.018 Uiso 1 1 calc R . .
C7 C 0.27575(8) 0.64546(19) 0.55631(11) 0.0156(3) Uani 1 1 d . . .
H7 H 0.2639 0.6528 0.6136 0.019 Uiso 1 1 calc R . .
C8 C 0.34909(8) 0.6420(2) 0.56661(11) 0.0159(3) Uani 1 1 d . . .
C9 C 0.36396(8) 0.6351(2) 0.47975(12) 0.0190(3) Uani 1 1 d . . .
H9 H 0.4131 0.6322 0.4841 0.023 Uiso 1 1 calc R . .
C10 C 0.30817(8) 0.6324(2) 0.38759(11) 0.0181(3) Uani 1 1 d . . .
H10 H 0.3196 0.6315 0.3299 0.022 Uiso 1 1 calc R . .
B1 B 0.21031(9) 0.3055(2) 0.21236(13) 0.0149(3) Uani 1 1 d . . .
H1B H 0.2671 0.3458 0.2225 0.018 Uiso 1 1 calc R . .
B2 B 0.15494(10) 0.1825(2) 0.10871(13) 0.0170(4) Uani 1 1 d . . .
H2B H 0.1754 0.1399 0.0502 0.020 Uiso 1 1 calc R . .
B3 B 0.06281(10) 0.2477(2) 0.07963(13) 0.0180(4) Uani 1 1 d . . .
H3B H 0.0225 0.2477 0.0019 0.022 Uiso 1 1 calc R . .
B4 B 0.06148(9) 0.4111(2) 0.16488(13) 0.0155(3) Uani 1 1 d . . .
H4B H 0.0210 0.5204 0.1440 0.019 Uiso 1 1 calc R . .
B5 B 0.18721(9) 0.0877(2) 0.22823(13) 0.0157(3) Uani 1 1 d . . .
H5B H 0.2289 -0.0191 0.2491 0.019 Uiso 1 1 calc R . .
B6 B 0.09548(10) 0.0511(2) 0.14612(13) 0.0184(4) Uani 1 1 d . . .
H6B H 0.0766 -0.0803 0.1130 0.022 Uiso 1 1 calc R . .
B7 B 0.03738(9) 0.1947(2) 0.18069(14) 0.0194(4) Uani 1 1 d . . .
H7B H -0.0199 0.1585 0.1703 0.023 Uiso 1 1 calc R . .
B8 B 0.09346(9) 0.3170(2) 0.28435(13) 0.0159(3) Uani 1 1 d . . .
H8B H 0.0736 0.3630 0.3428 0.019 Uiso 1 1 calc R . .
B9 B 0.18533(9) 0.2514(2) 0.31356(13) 0.0145(3) Uani 1 1 d . . .
H9B H 0.2258 0.2541 0.3911 0.017 Uiso 1 1 calc R . .
B10 B 0.11405(9) 0.0944(2) 0.27273(13) 0.0166(3) Uani 1 1 d . . .
H10B H 0.1073 -0.0086 0.3231 0.020 Uiso 1 1 calc R . .
B11 B 0.41130(10) 0.6518(2) 0.67238(14) 0.0203(4) Uani 1 1 d . . .
S1 S 0.55889(2) 0.61591(6) 0.95447(3) 0.02329(12) Uani 1 1 d . . .
O3 O 0.51264(6) 0.77741(15) 0.91655(8) 0.0213(3) Uani 1 1 d . . .
C11 C 0.63320(9) 0.6322(2) 0.91328(15) 0.0322(4) Uani 1 1 d . . .
H111 H 0.6566 0.7464 0.9317 0.048 Uiso 1 1 calc R . .
H112 H 0.6151 0.6192 0.8415 0.048 Uiso 1 1 calc R . .
H113 H 0.6686 0.5399 0.9440 0.048 Uiso 1 1 calc R . .
C12 C 0.60691(10) 0.6548(3) 1.08274(13) 0.0331(4) Uani 1 1 d . . .
H121 H 0.5722 0.6605 1.1163 0.050 Uiso 1 1 calc R . .
H122 H 0.6333 0.7656 1.0915 0.050 Uiso 1 1 calc R . .
H123 H 0.6415 0.5597 1.1108 0.050 Uiso 1 1 calc R . .
 
loop_
 _atom_site_aniso_label
 _atom_site_aniso_U_11
 _atom_site_aniso_U_22
 _atom_site_aniso_U_33
 _atom_site_aniso_U_23
 _atom_site_aniso_U_13
 _atom_site_aniso_U_12
O1 0.0170(6) 0.0338(7) 0.0167(6) -0.0066(5) 0.0016(5) 0.0012(5)
O2 0.0202(6) 0.0407(8) 0.0250(7) -0.0135(6) 0.0005(5) 0.0076(6)
C1 0.0151(7) 0.0110(7) 0.0108(7) 0.0012(6) 0.0036(6) 0.0015(6)
C2 0.0179(7) 0.0141(7) 0.0114(7) -0.0005(6) 0.0057(6) -0.0002(6)
C3 0.0294(9) 0.0174(8) 0.0145(8) 0.0029(6) 0.0095(7) -0.0005(7)
C4 0.0223(8) 0.0102(7) 0.0150(7) 0.0002(6) 0.0043(6) 0.0001(6)
C5 0.0186(7) 0.0080(7) 0.0160(7) -0.0005(6) 0.0065(6) -0.0007(6)
C6 0.0154(7) 0.0130(7) 0.0174(8) -0.0017(6) 0.0068(6) -0.0002(6)
C7 0.0178(7) 0.0153(7) 0.0150(7) -0.0014(6) 0.0074(6) -0.0002(6)
C8 0.0168(7) 0.0140(7) 0.0166(8) -0.0021(6) 0.0058(6) -0.0004(6)
C9 0.0155(7) 0.0217(8) 0.0220(8) -0.0044(7) 0.0095(6) -0.0036(6)
C10 0.0218(8) 0.0184(8) 0.0167(8) -0.0033(6) 0.0102(6) -0.0039(6)
B1 0.0150(8) 0.0136(8) 0.0167(8) -0.0014(7) 0.0067(7) 0.0010(7)
B2 0.0230(9) 0.0133(8) 0.0152(8) -0.0025(7) 0.0074(7) 0.0017(7)
B3 0.0192(8) 0.0147(9) 0.0160(9) -0.0030(7) 0.0017(7) -0.0034(7)
B4 0.0126(7) 0.0164(9) 0.0167(8) 0.0012(7) 0.0046(7) 0.0006(6)
B5 0.0184(8) 0.0126(8) 0.0156(8) -0.0004(7) 0.0056(7) 0.0016(6)
B6 0.0205(9) 0.0134(8) 0.0177(9) -0.0016(7) 0.0029(7) -0.0024(7)
B7 0.0164(8) 0.0156(9) 0.0246(10) 0.0021(7) 0.0057(7) -0.0023(7)
B8 0.0179(8) 0.0141(8) 0.0180(9) 0.0032(7) 0.0092(7) 0.0004(7)
B9 0.0181(8) 0.0109(8) 0.0133(8) 0.0015(6) 0.0046(7) 0.0026(6)
B10 0.0207(8) 0.0126(8) 0.0170(8) 0.0014(7) 0.0077(7) 0.0004(7)
B11 0.0173(8) 0.0214(9) 0.0228(9) -0.0007(8) 0.0081(7) 0.0001(7)
S1 0.01609(19) 0.0234(2) 0.0277(2) 0.00181(18) 0.00492(16) -0.00379(16)
O3 0.0167(5) 0.0266(6) 0.0186(6) -0.0003(5) 0.0042(5) -0.0002(5)
C11 0.0227(8) 0.0289(10) 0.0487(12) -0.0057(9) 0.0173(8) -0.0019(8)
C12 0.0244(9) 0.0392(11) 0.0269(10) 0.0084(8) -0.0010(7) -0.0071(8)
 
_geom_special_details
;
 All esds (except the esd in the dihedral angle between two l.s. planes)
 are estimated using the full covariance matrix.  The cell esds are taken
 into account individually in the estimation of esds in distances, angles
 and torsion angles; correlations between esds in cell parameters are only
 used when they are defined by crystal symmetry.  An approximate (isotropic)
 treatment of cell esds is used for estimating esds involving l.s. planes.
;
 
loop_
 _geom_bond_atom_site_label_1
 _geom_bond_atom_site_label_2
 _geom_bond_distance
 _geom_bond_site_symmetry_2
 _geom_bond_publ_flag
O1 B11 1.351(2) . ?
O1 H1O 0.87(2) . ?
O2 B11 1.361(2) . ?
O2 H2O 0.87(2) . ?
C1 C4 1.532(2) . ?
C1 C2 1.677(2) . ?
C1 B8 1.715(2) . ?
C1 B9 1.717(2) . ?
C1 B1 1.722(2) . ?
C1 B4 1.729(2) . ?
C2 C3 1.516(2) . ?
C2 B2 1.702(2) . ?
C2 B3 1.702(2) . ?
C2 B4 1.723(2) . ?
C2 B1 1.726(2) . ?
C3 H31 0.9800 . ?
C3 H32 0.9800 . ?
C3 H33 0.9800 . ?
C4 C5 1.509(2) . ?
C4 H41 0.9900 . ?
C4 H42 0.9900 . ?
C5 C10 1.394(2) . ?
C5 C6 1.394(2) . ?
C6 C7 1.386(2) . ?
C6 H6 0.9500 . ?
C7 C8 1.401(2) . ?
C7 H7 0.9500 . ?
C8 C9 1.405(2) . ?
C8 B11 1.581(2) . ?
C9 C10 1.390(2) . ?
C9 H9 0.9500 . ?
C10 H10 0.9500 . ?
B1 B5 1.767(2) . ?
B1 B9 1.771(2) . ?
B1 B2 1.776(2) . ?
B1 H1B 1.1200 . ?
B2 B5 1.777(2) . ?
B2 B6 1.780(2) . ?
B2 B3 1.782(3) . ?
B2 H2B 1.1200 . ?
B3 B4 1.772(2) . ?
B3 B7 1.773(3) . ?
B3 B6 1.779(3) . ?
B3 H3B 1.1200 . ?
B4 B7 1.764(3) . ?
B4 B8 1.774(2) . ?
B4 H4B 1.1200 . ?
B5 B9 1.778(2) . ?
B5 B6 1.789(2) . ?
B5 B10 1.792(2) . ?
B5 H5B 1.1200 . ?
B6 B10 1.778(2) . ?
B6 B7 1.792(3) . ?
B6 H6B 1.1200 . ?
B7 B8 1.778(3) . ?
B7 B10 1.786(3) . ?
B7 H7B 1.1200 . ?
B8 B10 1.775(2) . ?
B8 B9 1.778(2) . ?
B8 H8B 1.1200 . ?
B9 B10 1.780(2) . ?
B9 H9B 1.1200 . ?
B10 H10B 1.1200 . ?
S1 O3 1.5163(12) . ?
S1 C12 1.7848(19) . ?
S1 C11 1.7853(17) . ?
C11 H111 0.9800 . ?
C11 H112 0.9800 . ?
C11 H113 0.9800 . ?
C12 H121 0.9800 . ?
C12 H122 0.9800 . ?
C12 H123 0.9800 . ?
 
loop_
 _geom_angle_atom_site_label_1
 _geom_angle_atom_site_label_2
 _geom_angle_atom_site_label_3
 _geom_angle
 _geom_angle_site_symmetry_1
 _geom_angle_site_symmetry_3
 _geom_angle_publ_flag
B11 O1 H1O 111.7(13) . . ?
B11 O2 H2O 116.9(15) . . ?
C4 C1 C2 116.94(11) . . ?
C4 C1 B8 122.08(12) . . ?
C2 C1 B8 109.93(11) . . ?
C4 C1 B9 123.80(12) . . ?
C2 C1 B9 110.07(11) . . ?
B8 C1 B9 62.40(9) . . ?
C4 C1 B1 118.18(12) . . ?
C2 C1 B1 61.02(9) . . ?
B8 C1 B1 113.25(12) . . ?
B9 C1 B1 62.00(9) . . ?
C4 C1 B4 115.57(12) . . ?
C2 C1 B4 60.74(9) . . ?
B8 C1 B4 62.03(9) . . ?
B9 C1 B4 113.27(11) . . ?
B1 C1 B4 113.04(11) . . ?
C3 C2 C1 119.18(12) . . ?
C3 C2 B2 119.93(12) . . ?
C1 C2 B2 110.90(11) . . ?
C3 C2 B3 120.19(13) . . ?
C1 C2 B3 110.99(11) . . ?
B2 C2 B3 63.12(10) . . ?
C3 C2 B4 117.73(12) . . ?
C1 C2 B4 61.10(9) . . ?
B2 C2 B4 114.22(11) . . ?
B3 C2 B4 62.32(10) . . ?
C3 C2 B1 117.52(12) . . ?
C1 C2 B1 60.77(9) . . ?
B2 C2 B1 62.37(10) . . ?
B3 C2 B1 114.13(12) . . ?
B4 C2 B1 113.14(11) . . ?
C2 C3 H31 109.5 . . ?
C2 C3 H32 109.5 . . ?
H31 C3 H32 109.5 . . ?
C2 C3 H33 109.5 . . ?
H31 C3 H33 109.5 . . ?
H32 C3 H33 109.5 . . ?
C5 C4 C1 114.14(12) . . ?
C5 C4 H41 108.7 . . ?
C1 C4 H41 108.7 . . ?
C5 C4 H42 108.7 . . ?
C1 C4 H42 108.7 . . ?
H41 C4 H42 107.6 . . ?
C10 C5 C6 118.69(14) . . ?
C10 C5 C4 121.10(13) . . ?
C6 C5 C4 120.21(13) . . ?
C7 C6 C5 120.52(14) . . ?
C7 C6 H6 119.7 . . ?
C5 C6 H6 119.7 . . ?
C6 C7 C8 121.65(14) . . ?
C6 C7 H7 119.2 . . ?
C8 C7 H7 119.2 . . ?
C7 C8 C9 117.18(14) . . ?
C7 C8 B11 120.31(13) . . ?
C9 C8 B11 122.49(14) . . ?
C10 C9 C8 121.27(14) . . ?
C10 C9 H9 119.4 . . ?
C8 C9 H9 119.4 . . ?
C9 C10 C5 120.64(14) . . ?
C9 C10 H10 119.7 . . ?
C5 C10 H10 119.7 . . ?
C1 B1 C2 58.21(8) . . ?
C1 B1 B5 105.77(11) . . ?
C2 B1 B5 105.00(12) . . ?
C1 B1 B9 58.84(9) . . ?
C2 B1 B9 105.36(11) . . ?
B5 B1 B9 60.33(9) . . ?
C1 B1 B2 105.47(11) . . ?
C2 B1 B2 58.15(9) . . ?
B5 B1 B2 60.22(10) . . ?
B9 B1 B2 108.26(12) . . ?
C1 B1 H1B 123.7 . . ?
C2 B1 H1B 124.3 . . ?
B5 B1 H1B 122.5 . . ?
B9 B1 H1B 121.9 . . ?
B2 B1 H1B 122.1 . . ?
C2 B2 B1 59.48(9) . . ?
C2 B2 B5 105.60(11) . . ?
B1 B2 B5 59.66(10) . . ?
C2 B2 B6 105.04(11) . . ?
B1 B2 B6 107.91(12) . . ?
B5 B2 B6 60.38(10) . . ?
C2 B2 B3 58.44(9) . . ?
B1 B2 B3 107.98(12) . . ?
B5 B2 B3 108.27(12) . . ?
B6 B2 B3 59.94(10) . . ?
C2 B2 H2B 124.2 . . ?
B1 B2 H2B 121.5 . . ?
B5 B2 H2B 122.0 . . ?
B6 B2 H2B 122.3 . . ?
B3 B2 H2B 121.6 . . ?
C2 B3 B4 59.40(9) . . ?
C2 B3 B7 105.53(12) . . ?
B4 B3 B7 59.67(10) . . ?
C2 B3 B6 105.06(12) . . ?
B4 B3 B6 108.13(12) . . ?
B7 B3 B6 60.60(10) . . ?
C2 B3 B2 58.44(9) . . ?
B4 B3 B2 108.02(12) . . ?
B7 B3 B2 108.44(12) . . ?
B6 B3 B2 59.97(10) . . ?
C2 B3 H3B 124.3 . . ?
B4 B3 H3B 121.5 . . ?
B7 B3 H3B 121.9 . . ?
B6 B3 H3B 122.1 . . ?
B2 B3 H3B 121.6 . . ?
C2 B4 C1 58.16(8) . . ?
C2 B4 B7 105.07(12) . . ?
C1 B4 B7 105.59(12) . . ?
C2 B4 B3 58.28(9) . . ?
C1 B4 B3 105.41(11) . . ?
B7 B4 B3 60.19(10) . . ?
C2 B4 B8 105.18(11) . . ?
C1 B4 B8 58.61(9) . . ?
B7 B4 B8 60.31(10) . . ?
B3 B4 B8 108.14(12) . . ?
C2 B4 H4B 124.3 . . ?
C1 B4 H4B 123.8 . . ?
B7 B4 H4B 122.6 . . ?
B3 B4 H4B 122.1 . . ?
B8 B4 H4B 122.0 . . ?
B1 B5 B2 60.12(10) . . ?
B1 B5 B9 59.94(9) . . ?
B2 B5 B9 107.87(12) . . ?
B1 B5 B6 107.88(12) . . ?
B2 B5 B6 59.88(10) . . ?
B9 B5 B6 107.57(12) . . ?
B1 B5 B10 107.60(12) . . ?
B2 B5 B10 107.40(12) . . ?
B9 B5 B10 59.81(9) . . ?
B6 B5 B10 59.55(10) . . ?
B1 B5 H5B 121.7 . . ?
B2 B5 H5B 121.8 . . ?
B9 B5 H5B 121.9 . . ?
B6 B5 H5B 122.0 . . ?
B10 B5 H5B 122.2 . . ?
B10 B6 B3 107.66(12) . . ?
B10 B6 B2 107.90(12) . . ?
B3 B6 B2 60.10(10) . . ?
B10 B6 B5 60.31(10) . . ?
B3 B6 B5 107.89(12) . . ?
B2 B6 B5 59.74(10) . . ?
B10 B6 B7 60.03(10) . . ?
B3 B6 B7 59.53(10) . . ?
B2 B6 B7 107.69(12) . . ?
B5 B6 B7 108.16(12) . . ?
B10 B6 H6B 121.7 . . ?
B3 B6 H6B 122.0 . . ?
B2 B6 H6B 121.9 . . ?
B5 B6 H6B 121.6 . . ?
B7 B6 H6B 121.9 . . ?
B4 B7 B3 60.15(10) . . ?
B4 B7 B8 60.14(10) . . ?
B3 B7 B8 107.97(12) . . ?
B4 B7 B10 107.91(12) . . ?
B3 B7 B10 107.60(12) . . ?
B8 B7 B10 59.77(10) . . ?
B4 B7 B6 107.93(12) . . ?
B3 B7 B6 59.87(10) . . ?
B8 B7 B6 107.47(12) . . ?
B10 B7 B6 59.60(10) . . ?
B4 B7 H7B 121.5 . . ?
B3 B7 H7B 121.8 . . ?
B8 B7 H7B 121.9 . . ?
B10 B7 H7B 122.0 . . ?
B6 B7 H7B 122.0 . . ?
C1 B8 B4 59.36(9) . . ?
C1 B8 B10 105.46(11) . . ?
B4 B8 B10 107.89(12) . . ?
C1 B8 B9 58.84(9) . . ?
B4 B8 B9 108.20(12) . . ?
B10 B8 B9 60.12(9) . . ?
C1 B8 B7 105.57(12) . . ?
B4 B8 B7 59.54(10) . . ?
B10 B8 B7 60.35(10) . . ?
B9 B8 B7 108.44(12) . . ?
C1 B8 H8B 124.0 . . ?
B4 B8 H8B 121.6 . . ?
B10 B8 H8B 122.2 . . ?
B9 B8 H8B 121.3 . . ?
B7 B8 H8B 122.1 . . ?
C1 B9 B1 59.16(9) . . ?
C1 B9 B8 58.76(9) . . ?
B1 B9 B8 107.97(12) . . ?
C1 B9 B5 105.54(12) . . ?
B1 B9 B5 59.73(10) . . ?
B8 B9 B5 108.36(12) . . ?
C1 B9 B10 105.20(12) . . ?
B1 B9 B10 107.97(12) . . ?
B8 B9 B10 59.88(10) . . ?
B5 B9 B10 60.48(10) . . ?
C1 B9 H9B 124.2 . . ?
B1 B9 H9B 121.6 . . ?
B8 B9 H9B 121.5 . . ?
B5 B9 H9B 122.0 . . ?
B10 B9 H9B 122.2 . . ?
B8 B10 B6 108.18(12) . . ?
B8 B10 B9 60.00(9) . . ?
B6 B10 B9 107.97(12) . . ?
B8 B10 B7 59.88(10) . . ?
B6 B10 B7 60.38(10) . . ?
B9 B10 B7 107.97(12) . . ?
B8 B10 B5 107.85(12) . . ?
B6 B10 B5 60.13(10) . . ?
B9 B10 B5 59.72(9) . . ?
B7 B10 B5 108.30(12) . . ?
B8 B10 H10B 121.8 . . ?
B6 B10 H10B 121.5 . . ?
B9 B10 H10B 121.9 . . ?
B7 B10 H10B 121.5 . . ?
B5 B10 H10B 121.7 . . ?
O1 B11 O2 120.32(16) . . ?
O1 B11 C8 116.97(14) . . ?
O2 B11 C8 122.71(15) . . ?
O3 S1 C12 105.22(8) . . ?
O3 S1 C11 106.27(8) . . ?
C12 S1 C11 99.02(9) . . ?
S1 C11 H111 109.5 . . ?
S1 C11 H112 109.5 . . ?
H111 C11 H112 109.5 . . ?
S1 C11 H113 109.5 . . ?
H111 C11 H113 109.5 . . ?
H112 C11 H113 109.5 . . ?
S1 C12 H121 109.5 . . ?
S1 C12 H122 109.5 . . ?
H121 C12 H122 109.5 . . ?
S1 C12 H123 109.5 . . ?
H121 C12 H123 109.5 . . ?
H122 C12 H123 109.5 . . ?
 
loop_
 _geom_torsion_atom_site_label_1
 _geom_torsion_atom_site_label_2
 _geom_torsion_atom_site_label_3
 _geom_torsion_atom_site_label_4
 _geom_torsion
 _geom_torsion_site_symmetry_1
 _geom_torsion_site_symmetry_2
 _geom_torsion_site_symmetry_3
 _geom_torsion_site_symmetry_4
 _geom_torsion_publ_flag
C4 C1 C2 C3 1.81(19) . . . . ?
B8 C1 C2 C3 146.69(13) . . . . ?
B9 C1 C2 C3 -146.41(13) . . . . ?
B1 C1 C2 C3 -107.10(15) . . . . ?
B4 C1 C2 C3 107.49(14) . . . . ?
C4 C1 C2 B2 147.41(12) . . . . ?
B8 C1 C2 B2 -67.71(14) . . . . ?
B9 C1 C2 B2 -0.80(15) . . . . ?
B1 C1 C2 B2 38.51(11) . . . . ?
B4 C1 C2 B2 -106.91(13) . . . . ?
C4 C1 C2 B3 -144.41(13) . . . . ?
B8 C1 C2 B3 0.47(15) . . . . ?
B9 C1 C2 B3 67.37(14) . . . . ?
B1 C1 C2 B3 106.68(13) . . . . ?
B4 C1 C2 B3 -38.73(12) . . . . ?
C4 C1 C2 B4 -105.68(14) . . . . ?
B8 C1 C2 B4 39.20(11) . . . . ?
B9 C1 C2 B4 106.10(12) . . . . ?
B1 C1 C2 B4 145.41(12) . . . . ?
C4 C1 C2 B1 108.90(14) . . . . ?
B8 C1 C2 B1 -106.21(13) . . . . ?
B9 C1 C2 B1 -39.31(11) . . . . ?
B4 C1 C2 B1 -145.41(12) . . . . ?
C2 C1 C4 C5 -139.04(12) . . . . ?
B8 C1 C4 C5 80.62(17) . . . . ?
B9 C1 C4 C5 4.42(19) . . . . ?
B1 C1 C4 C5 -69.19(16) . . . . ?
B4 C1 C4 C5 152.35(12) . . . . ?
C1 C4 C5 C10 90.19(17) . . . . ?
C1 C4 C5 C6 -89.65(17) . . . . ?
C10 C5 C6 C7 -0.7(2) . . . . ?
C4 C5 C6 C7 179.15(13) . . . . ?
C5 C6 C7 C8 -1.2(2) . . . . ?
C6 C7 C8 C9 1.4(2) . . . . ?
C6 C7 C8 B11 179.49(14) . . . . ?
C7 C8 C9 C10 0.2(2) . . . . ?
B11 C8 C9 C10 -177.84(15) . . . . ?
C8 C9 C10 C5 -2.1(2) . . . . ?
C6 C5 C10 C9 2.3(2) . . . . ?
C4 C5 C10 C9 -177.57(14) . . . . ?
C4 C1 B1 C2 -106.91(13) . . . . ?
B8 C1 B1 C2 100.72(12) . . . . ?
B9 C1 B1 C2 137.63(12) . . . . ?
B4 C1 B1 C2 32.56(11) . . . . ?
C4 C1 B1 B5 154.96(12) . . . . ?
C2 C1 B1 B5 -98.13(12) . . . . ?
B8 C1 B1 B5 2.59(15) . . . . ?
B9 C1 B1 B5 39.49(11) . . . . ?
B4 C1 B1 B5 -65.58(14) . . . . ?
C4 C1 B1 B9 115.47(14) . . . . ?
C2 C1 B1 B9 -137.63(12) . . . . ?
B8 C1 B1 B9 -36.91(12) . . . . ?
B4 C1 B1 B9 -105.07(13) . . . . ?
C4 C1 B1 B2 -142.26(12) . . . . ?
C2 C1 B1 B2 -35.35(10) . . . . ?
B8 C1 B1 B2 65.37(15) . . . . ?
B9 C1 B1 B2 102.28(13) . . . . ?
B4 C1 B1 B2 -2.80(16) . . . . ?
C3 C2 B1 C1 109.78(14) . . . . ?
B2 C2 B1 C1 -138.97(12) . . . . ?
B3 C2 B1 C1 -101.49(13) . . . . ?
B4 C2 B1 C1 -32.71(11) . . . . ?
C3 C2 B1 B5 -150.72(13) . . . . ?
C1 C2 B1 B5 99.49(12) . . . . ?
B2 C2 B1 B5 -39.48(11) . . . . ?
B3 C2 B1 B5 -2.00(15) . . . . ?
B4 C2 B1 B5 66.78(14) . . . . ?
C3 C2 B1 B9 146.52(13) . . . . ?
C1 C2 B1 B9 36.73(10) . . . . ?
B2 C2 B1 B9 -102.23(13) . . . . ?
B3 C2 B1 B9 -64.75(15) . . . . ?
B4 C2 B1 B9 4.02(16) . . . . ?
C3 C2 B1 B2 -111.25(14) . . . . ?
C1 C2 B1 B2 138.97(12) . . . . ?
B3 C2 B1 B2 37.48(12) . . . . ?
B4 C2 B1 B2 106.25(13) . . . . ?
C3 C2 B2 B1 107.48(15) . . . . ?
C1 C2 B2 B1 -37.83(11) . . . . ?
B3 C2 B2 B1 -141.50(12) . . . . ?
B4 C2 B2 B1 -104.53(13) . . . . ?
C3 C2 B2 B5 146.83(13) . . . . ?
C1 C2 B2 B5 1.52(15) . . . . ?
B3 C2 B2 B5 -102.15(13) . . . . ?
B4 C2 B2 B5 -65.19(15) . . . . ?
B1 C2 B2 B5 39.35(11) . . . . ?
C3 C2 B2 B6 -150.32(13) . . . . ?
C1 C2 B2 B6 64.37(14) . . . . ?
B3 C2 B2 B6 -39.30(11) . . . . ?
B4 C2 B2 B6 -2.34(16) . . . . ?
B1 C2 B2 B6 102.19(12) . . . . ?
C3 C2 B2 B3 -111.02(15) . . . . ?
C1 C2 B2 B3 103.67(12) . . . . ?
B4 C2 B2 B3 36.96(12) . . . . ?
B1 C2 B2 B3 141.50(12) . . . . ?
C1 B1 B2 C2 35.38(10) . . . . ?
B5 B1 B2 C2 134.96(12) . . . . ?
B9 B1 B2 C2 97.08(12) . . . . ?
C1 B1 B2 B5 -99.58(12) . . . . ?
C2 B1 B2 B5 -134.96(12) . . . . ?
B9 B1 B2 B5 -37.88(11) . . . . ?
C1 B1 B2 B6 -61.86(14) . . . . ?
C2 B1 B2 B6 -97.24(12) . . . . ?
B5 B1 B2 B6 37.72(11) . . . . ?
B9 B1 B2 B6 -0.16(16) . . . . ?
C1 B1 B2 B3 1.48(15) . . . . ?
C2 B1 B2 B3 -33.90(11) . . . . ?
B5 B1 B2 B3 101.07(13) . . . . ?
B9 B1 B2 B3 63.19(15) . . . . ?
C3 C2 B3 B4 -107.62(15) . . . . ?
C1 C2 B3 B4 38.21(11) . . . . ?
B2 C2 B3 B4 141.74(12) . . . . ?
B1 C2 B3 B4 104.56(13) . . . . ?
C3 C2 B3 B7 -146.98(13) . . . . ?
C1 C2 B3 B7 -1.14(15) . . . . ?
B2 C2 B3 B7 102.39(13) . . . . ?
B4 C2 B3 B7 -39.35(11) . . . . ?
B1 C2 B3 B7 65.20(15) . . . . ?
C3 C2 B3 B6 149.95(13) . . . . ?
C1 C2 B3 B6 -64.21(14) . . . . ?
B2 C2 B3 B6 39.32(11) . . . . ?
B4 C2 B3 B6 -102.42(13) . . . . ?
B1 C2 B3 B6 2.13(16) . . . . ?
C3 C2 B3 B2 110.63(15) . . . . ?
C1 C2 B3 B2 -103.53(12) . . . . ?
B4 C2 B3 B2 -141.74(12) . . . . ?
B1 C2 B3 B2 -37.19(12) . . . . ?
B1 B2 B3 C2 34.32(11) . . . . ?
B5 B2 B3 C2 97.44(13) . . . . ?
B6 B2 B3 C2 135.03(12) . . . . ?
C2 B2 B3 B4 -34.09(11) . . . . ?
B1 B2 B3 B4 0.23(16) . . . . ?
B5 B2 B3 B4 63.36(15) . . . . ?
B6 B2 B3 B4 100.94(13) . . . . ?
C2 B2 B3 B7 -97.26(13) . . . . ?
B1 B2 B3 B7 -62.94(15) . . . . ?
B5 B2 B3 B7 0.18(16) . . . . ?
B6 B2 B3 B7 37.77(12) . . . . ?
C2 B2 B3 B6 -135.03(12) . . . . ?
B1 B2 B3 B6 -100.71(13) . . . . ?
B5 B2 B3 B6 -37.58(12) . . . . ?
C3 C2 B4 C1 -109.82(14) . . . . ?
B2 C2 B4 C1 101.45(13) . . . . ?
B3 C2 B4 C1 138.73(12) . . . . ?
B1 C2 B4 C1 32.60(11) . . . . ?
C3 C2 B4 B7 150.95(13) . . . . ?
C1 C2 B4 B7 -99.23(12) . . . . ?
B2 C2 B4 B7 2.22(16) . . . . ?
B3 C2 B4 B7 39.50(11) . . . . ?
B1 C2 B4 B7 -66.63(15) . . . . ?
C3 C2 B4 B3 111.46(15) . . . . ?
C1 C2 B4 B3 -138.73(12) . . . . ?
B2 C2 B4 B3 -37.27(12) . . . . ?
B1 C2 B4 B3 -106.13(13) . . . . ?
C3 C2 B4 B8 -146.33(13) . . . . ?
C1 C2 B4 B8 -36.51(11) . . . . ?
B2 C2 B4 B8 64.94(15) . . . . ?
B3 C2 B4 B8 102.21(13) . . . . ?
B1 C2 B4 B8 -3.92(16) . . . . ?
C4 C1 B4 C2 107.91(13) . . . . ?
B8 C1 B4 C2 -137.72(12) . . . . ?
B9 C1 B4 C2 -100.79(12) . . . . ?
B1 C1 B4 C2 -32.66(11) . . . . ?
C4 C1 B4 B7 -153.78(12) . . . . ?
C2 C1 B4 B7 98.30(12) . . . . ?
B8 C1 B4 B7 -39.42(11) . . . . ?
B9 C1 B4 B7 -2.48(15) . . . . ?
B1 C1 B4 B7 65.65(14) . . . . ?
C4 C1 B4 B3 143.51(12) . . . . ?
C2 C1 B4 B3 35.59(10) . . . . ?
B8 C1 B4 B3 -102.13(13) . . . . ?
B9 C1 B4 B3 -65.19(14) . . . . ?
B1 C1 B4 B3 2.94(15) . . . . ?
C4 C1 B4 B8 -114.37(14) . . . . ?
C2 C1 B4 B8 137.72(12) . . . . ?
B9 C1 B4 B8 36.93(12) . . . . ?
B1 C1 B4 B8 105.06(13) . . . . ?
B7 B3 B4 C2 134.94(12) . . . . ?
B6 B3 B4 C2 97.13(13) . . . . ?
B2 B3 B4 C2 33.70(11) . . . . ?
C2 B3 B4 C1 -35.54(10) . . . . ?
B7 B3 B4 C1 99.40(12) . . . . ?
B6 B3 B4 C1 61.58(14) . . . . ?
B2 B3 B4 C1 -1.84(15) . . . . ?
C2 B3 B4 B7 -134.94(12) . . . . ?
B6 B3 B4 B7 -37.81(11) . . . . ?
B2 B3 B4 B7 -101.24(13) . . . . ?
C2 B3 B4 B8 -96.97(12) . . . . ?
B7 B3 B4 B8 37.97(11) . . . . ?
B6 B3 B4 B8 0.16(16) . . . . ?
B2 B3 B4 B8 -63.27(15) . . . . ?
C1 B1 B5 B2 99.07(12) . . . . ?
C2 B1 B5 B2 38.48(10) . . . . ?
B9 B1 B5 B2 137.85(12) . . . . ?
C1 B1 B5 B9 -38.78(11) . . . . ?
C2 B1 B5 B9 -99.37(12) . . . . ?
B2 B1 B5 B9 -137.85(12) . . . . ?
C1 B1 B5 B6 61.58(14) . . . . ?
C2 B1 B5 B6 0.99(14) . . . . ?
B9 B1 B5 B6 100.36(13) . . . . ?
B2 B1 B5 B6 -37.49(11) . . . . ?
C1 B1 B5 B10 -1.27(15) . . . . ?
C2 B1 B5 B10 -61.87(14) . . . . ?
B9 B1 B5 B10 37.51(11) . . . . ?
B2 B1 B5 B10 -100.35(13) . . . . ?
C2 B2 B5 B1 -39.26(11) . . . . ?
B6 B2 B5 B1 -137.96(12) . . . . ?
B3 B2 B5 B1 -100.57(13) . . . . ?
C2 B2 B5 B9 -1.65(15) . . . . ?
B1 B2 B5 B9 37.61(11) . . . . ?
B6 B2 B5 B9 -100.35(13) . . . . ?
B3 B2 B5 B9 -62.96(15) . . . . ?
C2 B2 B5 B6 98.70(12) . . . . ?
B1 B2 B5 B6 137.96(12) . . . . ?
B3 B2 B5 B6 37.39(12) . . . . ?
C2 B2 B5 B10 61.43(14) . . . . ?
B1 B2 B5 B10 100.69(12) . . . . ?
B6 B2 B5 B10 -37.27(11) . . . . ?
B3 B2 B5 B10 0.12(16) . . . . ?
C2 B3 B6 B10 62.31(15) . . . . ?
B4 B3 B6 B10 0.12(16) . . . . ?
B7 B3 B6 B10 -37.28(12) . . . . ?
B2 B3 B6 B10 100.89(13) . . . . ?
C2 B3 B6 B2 -38.58(11) . . . . ?
B4 B3 B6 B2 -100.77(13) . . . . ?
B7 B3 B6 B2 -138.17(13) . . . . ?
C2 B3 B6 B5 -1.37(16) . . . . ?
B4 B3 B6 B5 -63.56(15) . . . . ?
B7 B3 B6 B5 -100.96(13) . . . . ?
B2 B3 B6 B5 37.21(11) . . . . ?
C2 B3 B6 B7 99.59(13) . . . . ?
B4 B3 B6 B7 37.40(11) . . . . ?
B2 B3 B6 B7 138.17(13) . . . . ?
C2 B2 B6 B10 -61.91(15) . . . . ?
B1 B2 B6 B10 0.32(16) . . . . ?
B5 B2 B6 B10 37.73(11) . . . . ?
B3 B2 B6 B10 -100.49(13) . . . . ?
C2 B2 B6 B3 38.58(11) . . . . ?
B1 B2 B6 B3 100.82(13) . . . . ?
B5 B2 B6 B3 138.22(13) . . . . ?
C2 B2 B6 B5 -99.64(12) . . . . ?
B1 B2 B6 B5 -37.40(11) . . . . ?
B3 B2 B6 B5 -138.22(13) . . . . ?
C2 B2 B6 B7 1.47(15) . . . . ?
B1 B2 B6 B7 63.70(15) . . . . ?
B5 B2 B6 B7 101.11(13) . . . . ?
B3 B2 B6 B7 -37.11(11) . . . . ?
B1 B5 B6 B10 -100.31(12) . . . . ?
B2 B5 B6 B10 -137.91(12) . . . . ?
B9 B5 B6 B10 -37.05(11) . . . . ?
B1 B5 B6 B3 0.23(16) . . . . ?
B2 B5 B6 B3 -37.37(12) . . . . ?
B9 B5 B6 B3 63.49(15) . . . . ?
B10 B5 B6 B3 100.54(13) . . . . ?
B1 B5 B6 B2 37.60(11) . . . . ?
B9 B5 B6 B2 100.86(13) . . . . ?
B10 B5 B6 B2 137.91(12) . . . . ?
B1 B5 B6 B7 -62.71(15) . . . . ?
B2 B5 B6 B7 -100.31(13) . . . . ?
B9 B5 B6 B7 0.55(16) . . . . ?
B10 B5 B6 B7 37.60(12) . . . . ?
C2 B4 B7 B3 -38.58(11) . . . . ?
C1 B4 B7 B3 -99.10(12) . . . . ?
B8 B4 B7 B3 -137.70(13) . . . . ?
C2 B4 B7 B8 99.13(12) . . . . ?
C1 B4 B7 B8 38.60(11) . . . . ?
B3 B4 B7 B8 137.70(13) . . . . ?
C2 B4 B7 B10 61.84(15) . . . . ?
C1 B4 B7 B10 1.31(15) . . . . ?
B3 B4 B7 B10 100.42(13) . . . . ?
B8 B4 B7 B10 -37.29(11) . . . . ?
C2 B4 B7 B6 -1.13(15) . . . . ?
C1 B4 B7 B6 -61.66(14) . . . . ?
B3 B4 B7 B6 37.44(12) . . . . ?
B8 B4 B7 B6 -100.26(13) . . . . ?
C2 B3 B7 B4 39.22(11) . . . . ?
B6 B3 B7 B4 138.03(12) . . . . ?
B2 B3 B7 B4 100.54(13) . . . . ?
C2 B3 B7 B8 1.37(16) . . . . ?
B4 B3 B7 B8 -37.85(12) . . . . ?
B6 B3 B7 B8 100.18(13) . . . . ?
B2 B3 B7 B8 62.69(15) . . . . ?
C2 B3 B7 B10 -61.73(15) . . . . ?
B4 B3 B7 B10 -100.95(13) . . . . ?
B6 B3 B7 B10 37.07(11) . . . . ?
B2 B3 B7 B10 -0.42(16) . . . . ?
C2 B3 B7 B6 -98.80(13) . . . . ?
B4 B3 B7 B6 -138.03(12) . . . . ?
B2 B3 B7 B6 -37.49(11) . . . . ?
B10 B6 B7 B4 100.66(13) . . . . ?
B3 B6 B7 B4 -37.56(11) . . . . ?
B2 B6 B7 B4 -0.20(16) . . . . ?
B5 B6 B7 B4 62.93(15) . . . . ?
B10 B6 B7 B3 138.22(13) . . . . ?
B2 B6 B7 B3 37.36(11) . . . . ?
B5 B6 B7 B3 100.49(13) . . . . ?
B10 B6 B7 B8 37.19(11) . . . . ?
B3 B6 B7 B8 -101.03(13) . . . . ?
B2 B6 B7 B8 -63.67(15) . . . . ?
B5 B6 B7 B8 -0.54(16) . . . . ?
B3 B6 B7 B10 -138.22(13) . . . . ?
B2 B6 B7 B10 -100.86(13) . . . . ?
B5 B6 B7 B10 -37.73(12) . . . . ?
C4 C1 B8 B4 104.12(14) . . . . ?
C2 C1 B8 B4 -38.63(11) . . . . ?
B9 C1 B8 B4 -141.47(12) . . . . ?
B1 C1 B8 B4 -104.72(13) . . . . ?
C4 C1 B8 B10 -153.95(13) . . . . ?
C2 C1 B8 B10 63.30(14) . . . . ?
B9 C1 B8 B10 -39.54(11) . . . . ?
B1 C1 B8 B10 -2.79(16) . . . . ?
B4 C1 B8 B10 101.93(13) . . . . ?
C4 C1 B8 B9 -114.41(15) . . . . ?
C2 C1 B8 B9 102.84(12) . . . . ?
B1 C1 B8 B9 36.75(12) . . . . ?
B4 C1 B8 B9 141.47(12) . . . . ?
C4 C1 B8 B7 143.17(13) . . . . ?
C2 C1 B8 B7 0.42(15) . . . . ?
B9 C1 B8 B7 -102.43(13) . . . . ?
B1 C1 B8 B7 -65.68(14) . . . . ?
B4 C1 B8 B7 39.05(11) . . . . ?
C2 B4 B8 C1 36.31(10) . . . . ?
B7 B4 B8 C1 135.25(12) . . . . ?
B3 B4 B8 C1 97.34(12) . . . . ?
C2 B4 B8 B10 -61.40(14) . . . . ?
C1 B4 B8 B10 -97.72(12) . . . . ?
B7 B4 B8 B10 37.54(11) . . . . ?
B3 B4 B8 B10 -0.38(15) . . . . ?
C2 B4 B8 B9 2.18(15) . . . . ?
C1 B4 B8 B9 -34.13(11) . . . . ?
B7 B4 B8 B9 101.12(13) . . . . ?
B3 B4 B8 B9 63.21(15) . . . . ?
C2 B4 B8 B7 -98.94(12) . . . . ?
C1 B4 B8 B7 -135.25(12) . . . . ?
B3 B4 B8 B7 -37.91(11) . . . . ?
B4 B7 B8 C1 -38.96(11) . . . . ?
B3 B7 B8 C1 -1.11(16) . . . . ?
B10 B7 B8 C1 99.19(12) . . . . ?
B6 B7 B8 C1 62.08(15) . . . . ?
B3 B7 B8 B4 37.85(12) . . . . ?
B10 B7 B8 B4 138.15(12) . . . . ?
B6 B7 B8 B4 101.04(13) . . . . ?
B4 B7 B8 B10 -138.15(12) . . . . ?
B3 B7 B8 B10 -100.30(13) . . . . ?
B6 B7 B8 B10 -37.12(11) . . . . ?
B4 B7 B8 B9 -100.71(13) . . . . ?
B3 B7 B8 B9 -62.86(15) . . . . ?
B10 B7 B8 B9 37.44(11) . . . . ?
B6 B7 B8 B9 0.32(16) . . . . ?
C4 C1 B9 B1 -106.71(15) . . . . ?
C2 C1 B9 B1 38.88(11) . . . . ?
B8 C1 B9 B1 141.49(12) . . . . ?
B4 C1 B9 B1 104.71(13) . . . . ?
C4 C1 B9 B8 111.79(15) . . . . ?
C2 C1 B9 B8 -102.62(12) . . . . ?
B1 C1 B9 B8 -141.49(12) . . . . ?
B4 C1 B9 B8 -36.79(12) . . . . ?
C4 C1 B9 B5 -145.87(13) . . . . ?
C2 C1 B9 B5 -0.28(15) . . . . ?
B8 C1 B9 B5 102.34(13) . . . . ?
B1 C1 B9 B5 -39.15(11) . . . . ?
B4 C1 B9 B5 65.55(14) . . . . ?
C4 C1 B9 B10 151.17(13) . . . . ?
C2 C1 B9 B10 -63.25(13) . . . . ?
B8 C1 B9 B10 39.37(11) . . . . ?
B1 C1 B9 B10 -102.12(12) . . . . ?
B4 C1 B9 B10 2.58(15) . . . . ?
C2 B1 B9 C1 -36.45(10) . . . . ?
B5 B1 B9 C1 -135.22(12) . . . . ?
B2 B1 B9 C1 -97.39(12) . . . . ?
C1 B1 B9 B8 34.03(11) . . . . ?
C2 B1 B9 B8 -2.42(15) . . . . ?
B5 B1 B9 B8 -101.19(13) . . . . ?
B2 B1 B9 B8 -63.36(15) . . . . ?
C1 B1 B9 B5 135.22(12) . . . . ?
C2 B1 B9 B5 98.77(12) . . . . ?
B2 B1 B9 B5 37.83(11) . . . . ?
C1 B1 B9 B10 97.32(12) . . . . ?
C2 B1 B9 B10 60.88(14) . . . . ?
B5 B1 B9 B10 -37.89(11) . . . . ?
B2 B1 B9 B10 -0.07(15) . . . . ?
B4 B8 B9 C1 34.34(11) . . . . ?
B10 B8 B9 C1 134.95(12) . . . . ?
B7 B8 B9 C1 97.42(12) . . . . ?
C1 B8 B9 B1 -34.19(11) . . . . ?
B4 B8 B9 B1 0.15(16) . . . . ?
B10 B8 B9 B1 100.76(13) . . . . ?
B7 B8 B9 B1 63.22(15) . . . . ?
C1 B8 B9 B5 -97.40(12) . . . . ?
B4 B8 B9 B5 -63.05(15) . . . . ?
B10 B8 B9 B5 37.56(11) . . . . ?
B7 B8 B9 B5 0.02(16) . . . . ?
C1 B8 B9 B10 -134.95(12) . . . . ?
B4 B8 B9 B10 -100.61(13) . . . . ?
B7 B8 B9 B10 -37.54(12) . . . . ?
B1 B5 B9 C1 38.88(11) . . . . ?
B2 B5 B9 C1 1.20(15) . . . . ?
B6 B5 B9 C1 -62.00(14) . . . . ?
B10 B5 B9 C1 -98.94(12) . . . . ?
B2 B5 B9 B1 -37.69(11) . . . . ?
B6 B5 B9 B1 -100.88(13) . . . . ?
B10 B5 B9 B1 -137.82(12) . . . . ?
B1 B5 B9 B8 100.53(13) . . . . ?
B2 B5 B9 B8 62.84(15) . . . . ?
B6 B5 B9 B8 -0.35(15) . . . . ?
B10 B5 B9 B8 -37.29(11) . . . . ?
B1 B5 B9 B10 137.82(12) . . . . ?
B2 B5 B9 B10 100.14(13) . . . . ?
B6 B5 B9 B10 36.94(11) . . . . ?
C1 B8 B10 B6 -61.75(14) . . . . ?
B4 B8 B10 B6 0.45(16) . . . . ?
B9 B8 B10 B6 -100.68(13) . . . . ?
B7 B8 B10 B6 37.63(11) . . . . ?
C1 B8 B10 B9 38.93(11) . . . . ?
B4 B8 B10 B9 101.13(13) . . . . ?
B7 B8 B10 B9 138.31(12) . . . . ?
C1 B8 B10 B7 -99.38(13) . . . . ?
B4 B8 B10 B7 -37.18(11) . . . . ?
B9 B8 B10 B7 -138.31(12) . . . . ?
C1 B8 B10 B5 1.83(15) . . . . ?
B4 B8 B10 B5 64.03(15) . . . . ?
B9 B8 B10 B5 -37.10(11) . . . . ?
B7 B8 B10 B5 101.21(13) . . . . ?
B3 B6 B10 B8 -0.35(16) . . . . ?
B2 B6 B10 B8 63.10(15) . . . . ?
B5 B6 B10 B8 100.57(13) . . . . ?
B7 B6 B10 B8 -37.41(11) . . . . ?
B3 B6 B10 B9 -63.82(15) . . . . ?
B2 B6 B10 B9 -0.37(16) . . . . ?
B5 B6 B10 B9 37.11(11) . . . . ?
B7 B6 B10 B9 -100.88(13) . . . . ?
B3 B6 B10 B7 37.06(12) . . . . ?
B2 B6 B10 B7 100.51(13) . . . . ?
B5 B6 B10 B7 137.99(13) . . . . ?
B3 B6 B10 B5 -100.93(13) . . . . ?
B2 B6 B10 B5 -37.48(11) . . . . ?
B7 B6 B10 B5 -137.99(13) . . . . ?
C1 B9 B10 B8 -38.83(10) . . . . ?
B1 B9 B10 B8 -100.77(13) . . . . ?
B5 B9 B10 B8 -138.33(12) . . . . ?
C1 B9 B10 B6 62.21(14) . . . . ?
B1 B9 B10 B6 0.27(15) . . . . ?
B8 B9 B10 B6 101.04(13) . . . . ?
B5 B9 B10 B6 -37.29(11) . . . . ?
C1 B9 B10 B7 -1.62(15) . . . . ?
B1 B9 B10 B7 -63.56(14) . . . . ?
B8 B9 B10 B7 37.21(11) . . . . ?
B5 B9 B10 B7 -101.12(13) . . . . ?
C1 B9 B10 B5 99.50(12) . . . . ?
B1 B9 B10 B5 37.56(11) . . . . ?
B8 B9 B10 B5 138.33(12) . . . . ?
B4 B7 B10 B8 37.45(11) . . . . ?
B3 B7 B10 B8 100.94(13) . . . . ?
B6 B7 B10 B8 138.14(12) . . . . ?
B4 B7 B10 B6 -100.69(13) . . . . ?
B3 B7 B10 B6 -37.19(12) . . . . ?
B8 B7 B10 B6 -138.14(12) . . . . ?
B4 B7 B10 B9 0.19(16) . . . . ?
B3 B7 B10 B9 63.68(15) . . . . ?
B8 B7 B10 B9 -37.27(11) . . . . ?
B6 B7 B10 B9 100.87(13) . . . . ?
B4 B7 B10 B5 -63.00(15) . . . . ?
B3 B7 B10 B5 0.49(16) . . . . ?
B8 B7 B10 B5 -100.45(13) . . . . ?
B6 B7 B10 B5 37.69(12) . . . . ?
B1 B5 B10 B8 -0.35(16) . . . . ?
B2 B5 B10 B8 -63.71(15) . . . . ?
B9 B5 B10 B8 37.22(11) . . . . ?
B6 B5 B10 B8 -101.13(13) . . . . ?
B1 B5 B10 B6 100.78(13) . . . . ?
B2 B5 B10 B6 37.41(11) . . . . ?
B9 B5 B10 B6 138.35(12) . . . . ?
B1 B5 B10 B9 -37.57(11) . . . . ?
B2 B5 B10 B9 -100.93(13) . . . . ?
B6 B5 B10 B9 -138.35(12) . . . . ?
B1 B5 B10 B7 62.99(15) . . . . ?
B2 B5 B10 B7 -0.38(16) . . . . ?
B9 B5 B10 B7 100.55(13) . . . . ?
B6 B5 B10 B7 -37.79(12) . . . . ?
C7 C8 B11 O1 -32.4(2) . . . . ?
C9 C8 B11 O1 145.66(16) . . . . ?
C7 C8 B11 O2 147.35(17) . . . . ?
C9 C8 B11 O2 -34.6(3) . . . . ?
 
loop_
 _geom_hbond_atom_site_label_D
 _geom_hbond_atom_site_label_H
 _geom_hbond_atom_site_label_A
 _geom_hbond_distance_DH
 _geom_hbond_distance_HA
 _geom_hbond_distance_DA
 _geom_hbond_angle_DHA
 _geom_hbond_site_symmetry_A
O1 H1O O3  0.87(2) 1.87(2) 2.7385(16) 175.8(19) .
O2 H2O O3  0.87(2) 1.97(2) 2.8234(17) 169(2) 2_646
 
_diffrn_measured_fraction_theta_max    0.994
_diffrn_reflns_theta_full              25.0
_diffrn_measured_fraction_theta_full   0.999
_refine_diff_density_max    0.31
_refine_diff_density_min   -0.34
_refine_diff_density_rms    0.055
# END OF CIF for Compound3

data_Compound10
 
_audit_creation_method            SHELXL-97 
_chemical_name_systematic 
; 
 ? 
; 
_chemical_name_common             ? 
_chemical_melting_point           ? 
_chemical_compound_source          'local laboratory'
_chemical_formula_moiety      'C10 H19 B10 I' 
_chemical_formula_sum         'C10 H19 B10 I' 
_chemical_formula_weight          374.25 
 
loop_ 
 _atom_type_symbol 
 _atom_type_description 
 _atom_type_scat_dispersion_real 
 _atom_type_scat_dispersion_imag 
 _atom_type_scat_source 
 'C'  'C'   0.0033   0.0016 
 'International Tables Vol C Tables 4.2.6.8 and 6.1.1.4' 
 'H'  'H'   0.0000   0.0000 
 'International Tables Vol C Tables 4.2.6.8 and 6.1.1.4' 
 'B'  'B'   0.0013   0.0007 
 'International Tables Vol C Tables 4.2.6.8 and 6.1.1.4' 
 'I'  'I'  -0.4742   1.8119 
 'International Tables Vol C Tables 4.2.6.8 and 6.1.1.4' 
 
_symmetry_space_group_name_H-M 'P 21/c        '
_symmetry_space_group_name_Hall '-P 2ybc '
_symmetry_cell_setting 'Monoclinic'
 
loop_ 
 _symmetry_equiv_pos_as_xyz 
 'x, y, z' 
 '-x, y+1/2, -z+1/2' 
 '-x, -y, -z' 
 'x, -y-1/2, z-1/2' 
 
_cell_length_a                    17.049(3) 
_cell_length_b                    7.9948(11) 
_cell_length_c                    12.027(2) 
_cell_angle_alpha                 90
_cell_angle_beta                  103.844(7) 
_cell_angle_gamma                 90
_cell_volume                      1591.7(4) 
_cell_formula_units_Z             4 
_cell_measurement_temperature     115
_cell_measurement_reflns_used     3992
_cell_measurement_theta_min        2.5
_cell_measurement_theta_max        30.5
 
_exptl_crystal_description        lath
_exptl_crystal_colour             colorless
_exptl_crystal_size_max           0.32 
_exptl_crystal_size_mid           0.25 
_exptl_crystal_size_min           0.08 
_exptl_crystal_density_meas       ? 
_exptl_crystal_density_diffrn     1.562 
_exptl_crystal_density_method     'not measured' 
_exptl_crystal_F_000              728 
_exptl_absorpt_coefficient_mu     1.991 
_exptl_absorpt_correction_type 'multi-scan' 
_exptl_absorpt_correction_T_min   0.568 
_exptl_absorpt_correction_T_max   0.857 
_exptl_absorpt_process_details  'HKL Scalepack (Otwinowski & Minor 1997)' 
 
_exptl_special_details 
; 
 ? 
; 
 
_diffrn_ambient_temperature       115
_diffrn_radiation_wavelength      0.71073 
_diffrn_radiation_type            MoK\a 
_diffrn_radiation_source          'fine-focus sealed tube' 
_diffrn_radiation_monochromator   graphite 
_diffrn_measurement_device  'KappaCCD (with Oxford Cryostream)'
_diffrn_measurement_method       ' \w scans with \k offsets'
_diffrn_detector_area_resol_mean  ? 
_diffrn_standards_number          0 
_diffrn_standards_interval_count  ? 
_diffrn_standards_interval_time   ? 
_diffrn_standards_decay_%         <2 
_diffrn_reflns_number             19894
_diffrn_reflns_av_R_equivalents   0.016 
_diffrn_reflns_av_sigmaI/netI     0.0238 
_diffrn_reflns_limit_h_min        -23 
_diffrn_reflns_limit_h_max        22 
_diffrn_reflns_limit_k_min        -9 
_diffrn_reflns_limit_k_max        10 
_diffrn_reflns_limit_l_min        -16 
_diffrn_reflns_limit_l_max        16 
_diffrn_reflns_theta_min          2.8 
_diffrn_reflns_theta_max          30.5 
_reflns_number_total              4454 
_reflns_number_gt                 4120 
_reflns_threshold_expression      I>2\s(I) 
 
_computing_data_collection        'COLLECT (Nonius, 2000)'
_computing_cell_refinement        'HKL Scalepack (Otwinowski & Minor 1997)'
_computing_data_reduction   'HKL Denzo and Scalepack (Otwinowski & Minor 1997)'
_computing_structure_solution     'SIR97 (Altomare  et al., 1999)'
_computing_structure_refinement   'SHELXL-97 (Sheldrick, 1997)' 
_computing_molecular_graphics     'ORTEP-3 for Windows (Farrugia, 1997)'
_computing_publication_material   'SHELXL-97 (Sheldrick, 1997)'
 
_refine_special_details 
; 
 Refinement of F^2^ against ALL reflections.  The weighted R-factor wR and 
 goodness of fit S are based on F^2^, conventional R-factors R are based 
 on F, with F set to zero for negative F^2^. The threshold expression of 
 F^2^ > 2sigma(F^2^) is used only for calculating R-factors(gt) etc. and is 
 not relevant to the choice of reflections for refinement.  R-factors based 
 on F^2^ are statistically about twice as large as those based on F, and R- 
 factors based on ALL data will be even larger. 
; 
 
_refine_ls_structure_factor_coef  Fsqd  
_refine_ls_matrix_type            full 
_refine_ls_weighting_scheme       calc  
_refine_ls_weighting_details 
 'calc w=1/[\s^2^(Fo^2^)+(0.0298P)^2^+1.7847P] where P=(Fo^2^+2Fc^2^)/3' 
_atom_sites_solution_primary      direct 
_atom_sites_solution_secondary    difmap 
_atom_sites_solution_hydrogens    geom 
_refine_ls_hydrogen_treatment     constr 
_refine_ls_extinction_method      SHELXL 
_refine_ls_extinction_coef        0.0031(4) 
_refine_ls_extinction_expression 
 'Fc^*^=kFc[1+0.001xFc^2^\l^3^/sin(2\q)]^-1/4^' 
_refine_ls_number_reflns          4454 
_refine_ls_number_parameters      192 
_refine_ls_number_restraints      0 
_refine_ls_R_factor_all           0.028
_refine_ls_R_factor_gt            0.025 
_refine_ls_wR_factor_ref          0.061 
_refine_ls_wR_factor_gt           0.064 
_refine_ls_goodness_of_fit_ref    1.037 
_refine_ls_restrained_S_all       1.037 
_refine_ls_shift/su_max           0.001 
_refine_ls_shift/su_mean          0.000 
 
loop_ 
 _atom_site_label 
 _atom_site_type_symbol 
 _atom_site_fract_x 
 _atom_site_fract_y 
 _atom_site_fract_z 
 _atom_site_U_iso_or_equiv 
 _atom_site_adp_type 
 _atom_site_occupancy 
 _atom_site_symmetry_multiplicity 
 _atom_site_calc_flag 
 _atom_site_refinement_flags 
 _atom_site_disorder_assembly 
 _atom_site_disorder_group 
I1 I 0.405947(8) 0.092712(17) 0.231732(10) 0.02510(6) Uani 1 1 d . . . 
C1 C 0.86068(10) 0.3300(2) 0.59108(15) 0.0155(3) Uani 1 1 d . . . 
C2 C 0.77276(10) 0.3669(2) 0.62710(14) 0.0143(3) Uani 1 1 d . . . 
C3 C 0.71827(11) 0.2190(2) 0.64019(15) 0.0173(3) Uani 1 1 d . . . 
H3A H 0.7513 0.1158 0.6497 0.021 Uiso 1 1 calc R . . 
H3B H 0.6999 0.2353 0.7116 0.021 Uiso 1 1 calc R . . 
C4 C 0.64461(11) 0.1914(2) 0.54314(15) 0.0160(3) Uani 1 1 d . . . 
C5 C 0.57151(11) 0.2693(2) 0.54323(15) 0.0194(3) Uani 1 1 d . . . 
H5 H 0.5684 0.3425 0.6043 0.023 Uiso 1 1 calc R . . 
C6 C 0.50276(11) 0.2417(3) 0.45526(17) 0.0216(4) Uani 1 1 d . . . 
H6 H 0.4532 0.2949 0.4566 0.026 Uiso 1 1 calc R . . 
C7 C 0.50773(11) 0.1358(2) 0.36599(15) 0.0178(3) Uani 1 1 d . . . 
C8 C 0.57983(12) 0.0558(2) 0.36425(16) 0.0203(4) Uani 1 1 d . . . 
H8 H 0.5829 -0.0165 0.3028 0.024 Uiso 1 1 calc R . . 
C9 C 0.64741(12) 0.0830(2) 0.45366(17) 0.0189(3) Uani 1 1 d . . . 
H9 H 0.6964 0.0264 0.4536 0.023 Uiso 1 1 calc R . . 
C10 C 0.88216(12) 0.1521(2) 0.56611(18) 0.0225(4) Uani 1 1 d . . . 
H10A H 0.8913 0.0856 0.6365 0.034 Uiso 1 1 calc R . . 
H10B H 0.9313 0.1526 0.5374 0.034 Uiso 1 1 calc R . . 
H10C H 0.8377 0.1031 0.5082 0.034 Uiso 1 1 calc R . . 
B1 B 0.86186(13) 0.3791(3) 0.73127(17) 0.0167(4) Uani 1 1 d . . . 
H1 H 0.8793 0.2891 0.8044 0.020 Uiso 1 1 calc R . . 
B2 B 0.93390(12) 0.4641(3) 0.66196(17) 0.0181(4) Uani 1 1 d . . . 
H2 H 0.9996 0.4315 0.6900 0.022 Uiso 1 1 calc R . . 
B3 B 0.88513(12) 0.4938(3) 0.51484(17) 0.0180(4) Uani 1 1 d . . . 
H3 H 0.9187 0.4810 0.4458 0.022 Uiso 1 1 calc R . . 
B4 B 0.78361(13) 0.4267(3) 0.49380(17) 0.0171(4) Uani 1 1 d . . . 
H4 H 0.7500 0.3679 0.4116 0.021 Uiso 1 1 calc R . . 
B5 B 0.88576(14) 0.5945(3) 0.74550(18) 0.0192(4) Uani 1 1 d . . . 
H5A H 0.9196 0.6495 0.8289 0.023 Uiso 1 1 calc R . . 
B6 B 0.90026(13) 0.6669(3) 0.61071(18) 0.0192(4) Uani 1 1 d . . . 
H6A H 0.9436 0.7700 0.6050 0.023 Uiso 1 1 calc R . . 
B7 B 0.80647(13) 0.6430(3) 0.50630(19) 0.0204(4) Uani 1 1 d . . . 
H7 H 0.7878 0.7303 0.4318 0.025 Uiso 1 1 calc R . . 
B8 B 0.73524(13) 0.5574(3) 0.57660(18) 0.0188(4) Uani 1 1 d . . . 
H8A H 0.6692 0.5868 0.5486 0.023 Uiso 1 1 calc R . . 
B9 B 0.78400(13) 0.5281(3) 0.72304(17) 0.0183(4) Uani 1 1 d . . . 
H9A H 0.7500 0.5383 0.7918 0.022 Uiso 1 1 calc R . . 
B10 B 0.80740(13) 0.7060(3) 0.6493(2) 0.0213(4) Uani 1 1 d . . . 
H10 H 0.7895 0.8353 0.6692 0.026 Uiso 1 1 calc R . . 
 
loop_ 
 _atom_site_aniso_label 
 _atom_site_aniso_U_11 
 _atom_site_aniso_U_22 
 _atom_site_aniso_U_33 
 _atom_site_aniso_U_23 
 _atom_site_aniso_U_13 
 _atom_site_aniso_U_12 
I1 0.02286(8) 0.02783(9) 0.02081(8) 0.00428(5) -0.00229(5) -0.00928(5) 
C1 0.0134(7) 0.0161(8) 0.0171(7) 0.0006(6) 0.0040(6) 0.0003(6) 
C2 0.0129(7) 0.0154(7) 0.0143(7) 0.0015(6) 0.0028(6) 0.0005(6) 
C3 0.0164(8) 0.0176(8) 0.0174(7) 0.0023(6) 0.0031(6) -0.0031(6) 
C4 0.0154(8) 0.0160(8) 0.0169(7) 0.0005(6) 0.0046(6) -0.0031(6) 
C5 0.0188(8) 0.0225(9) 0.0184(8) -0.0043(7) 0.0072(7) -0.0006(7) 
C6 0.0157(8) 0.0242(9) 0.0251(9) -0.0024(7) 0.0054(7) 0.0014(7) 
C7 0.0166(8) 0.0186(8) 0.0169(8) 0.0006(6) 0.0011(6) -0.0052(6) 
C8 0.0230(9) 0.0190(8) 0.0197(8) -0.0047(7) 0.0064(7) -0.0024(7) 
C9 0.0172(8) 0.0187(8) 0.0217(8) -0.0014(6) 0.0062(7) 0.0003(6) 
C10 0.0210(9) 0.0189(9) 0.0287(9) -0.0024(7) 0.0079(7) 0.0031(7) 
B1 0.0171(9) 0.0183(9) 0.0138(8) 0.0011(7) 0.0021(7) -0.0014(7) 
B2 0.0148(9) 0.0196(9) 0.0194(9) 0.0011(7) 0.0034(7) -0.0018(7) 
B3 0.0170(9) 0.0201(9) 0.0179(9) 0.0015(7) 0.0064(7) -0.0028(7) 
B4 0.0165(9) 0.0203(9) 0.0143(8) 0.0030(7) 0.0030(7) -0.0014(7) 
B5 0.0202(9) 0.0193(10) 0.0186(9) -0.0026(7) 0.0057(8) -0.0050(7) 
B6 0.0200(9) 0.0160(9) 0.0225(9) 0.0011(7) 0.0071(8) -0.0038(7) 
B7 0.0193(9) 0.0190(9) 0.0231(10) 0.0073(8) 0.0051(8) -0.0001(8) 
B8 0.0169(9) 0.0172(9) 0.0225(9) 0.0041(7) 0.0051(7) 0.0019(7) 
B9 0.0194(9) 0.0179(9) 0.0189(9) -0.0030(7) 0.0075(7) -0.0012(7) 
B10 0.0215(10) 0.0143(9) 0.0299(10) 0.0001(8) 0.0097(8) -0.0008(7) 
 
_geom_special_details 
; 
 All esds (except the esd in the dihedral angle between two l.s. planes) 
 are estimated using the full covariance matrix.  The cell esds are taken 
 into account individually in the estimation of esds in distances, angles 
 and torsion angles; correlations between esds in cell parameters are only 
 used when they are defined by crystal symmetry.  An approximate (isotropic) 
 treatment of cell esds is used for estimating esds involving l.s. planes. 
; 
 
loop_ 
 _geom_bond_atom_site_label_1 
 _geom_bond_atom_site_label_2 
 _geom_bond_distance 
 _geom_bond_site_symmetry_2 
 _geom_bond_publ_flag 
I1 C7 2.0967(18) . ? 
C1 C10 1.516(3) . ? 
C1 C2 1.683(2) . ? 
C1 B3 1.707(3) . ? 
C1 B2 1.710(3) . ? 
C1 B4 1.720(3) . ? 
C1 B1 1.727(3) . ? 
C2 C3 1.535(2) . ? 
C2 B8 1.706(3) . ? 
C2 B9 1.710(3) . ? 
C2 B4 1.725(3) . ? 
C2 B1 1.725(3) . ? 
C3 C4 1.512(2) . ? 
C3 H3A 0.9900 . ? 
C3 H3B 0.9900 . ? 
C4 C9 1.391(3) . ? 
C4 C5 1.394(3) . ? 
C5 C6 1.396(3) . ? 
C5 H5 0.9500 . ? 
C6 C7 1.386(3) . ? 
C6 H6 0.9500 . ? 
C7 C8 1.390(3) . ? 
C8 C9 1.392(3) . ? 
C8 H8 0.9500 . ? 
C9 H9 0.9500 . ? 
C10 H10A 0.9800 . ? 
C10 H10B 0.9800 . ? 
C10 H10C 0.9800 . ? 
B1 B5 1.768(3) . ? 
B1 B9 1.769(3) . ? 
B1 B2 1.776(3) . ? 
B1 H1 1.1200 . ? 
B2 B5 1.779(3) . ? 
B2 B6 1.781(3) . ? 
B2 B3 1.782(3) . ? 
B2 H2 1.1200 . ? 
B3 B4 1.771(3) . ? 
B3 B7 1.779(3) . ? 
B3 B6 1.780(3) . ? 
B3 H3 1.1200 . ? 
B4 B7 1.771(3) . ? 
B4 B8 1.777(3) . ? 
B4 H4 1.1200 . ? 
B5 B9 1.772(3) . ? 
B5 B10 1.783(3) . ? 
B5 B6 1.793(3) . ? 
B5 H5A 1.1200 . ? 
B6 B10 1.781(3) . ? 
B6 B7 1.791(3) . ? 
B6 H6A 1.1200 . ? 
B7 B8 1.775(3) . ? 
B7 B10 1.788(3) . ? 
B7 H7 1.1200 . ? 
B8 B9 1.774(3) . ? 
B8 B10 1.782(3) . ? 
B8 H8A 1.1200 . ? 
B9 B10 1.771(3) . ? 
B9 H9A 1.1200 . ? 
B10 H10 1.1200 . ? 
 
loop_ 
 _geom_angle_atom_site_label_1 
 _geom_angle_atom_site_label_2 
 _geom_angle_atom_site_label_3 
 _geom_angle 
 _geom_angle_site_symmetry_1 
 _geom_angle_site_symmetry_3 
 _geom_angle_publ_flag 
C10 C1 C2 119.19(15) . . ? 
C10 C1 B3 120.79(15) . . ? 
C2 C1 B3 110.52(13) . . ? 
C10 C1 B2 120.31(15) . . ? 
C2 C1 B2 110.51(14) . . ? 
B3 C1 B2 62.85(12) . . ? 
C10 C1 B4 117.93(15) . . ? 
C2 C1 B4 60.89(11) . . ? 
B3 C1 B4 62.25(11) . . ? 
B2 C1 B4 113.88(14) . . ? 
C10 C1 B1 117.38(15) . . ? 
C2 C1 B1 60.77(11) . . ? 
B3 C1 B1 113.74(14) . . ? 
B2 C1 B1 62.23(12) . . ? 
B4 C1 B1 112.98(14) . . ? 
C3 C2 C1 119.30(14) . . ? 
C3 C2 B8 122.65(15) . . ? 
C1 C2 B8 110.26(13) . . ? 
C3 C2 B9 118.97(14) . . ? 
C1 C2 B9 110.07(13) . . ? 
B8 C2 B9 62.57(12) . . ? 
C3 C2 B4 120.73(14) . . ? 
C1 C2 B4 60.61(11) . . ? 
B8 C2 B4 62.37(12) . . ? 
B9 C2 B4 113.50(14) . . ? 
C3 C2 B1 114.74(14) . . ? 
C1 C2 B1 60.86(11) . . ? 
B8 C2 B1 113.46(14) . . ? 
B9 C2 B1 61.98(12) . . ? 
B4 C2 B1 112.81(14) . . ? 
C4 C3 C2 116.39(14) . . ? 
C4 C3 H3A 108.2 . . ? 
C2 C3 H3A 108.2 . . ? 
C4 C3 H3B 108.2 . . ? 
C2 C3 H3B 108.2 . . ? 
H3A C3 H3B 107.3 . . ? 
C9 C4 C5 118.37(16) . . ? 
C9 C4 C3 120.81(17) . . ? 
C5 C4 C3 120.78(16) . . ? 
C4 C5 C6 121.19(17) . . ? 
C4 C5 H5 119.4 . . ? 
C6 C5 H5 119.4 . . ? 
C7 C6 C5 119.19(17) . . ? 
C7 C6 H6 120.4 . . ? 
C5 C6 H6 120.4 . . ? 
C6 C7 C8 120.73(17) . . ? 
C6 C7 I1 120.27(14) . . ? 
C8 C7 I1 119.00(14) . . ? 
C7 C8 C9 119.21(17) . . ? 
C7 C8 H8 120.4 . . ? 
C9 C8 H8 120.4 . . ? 
C4 C9 C8 121.29(18) . . ? 
C4 C9 H9 119.4 . . ? 
C8 C9 H9 119.4 . . ? 
C1 C10 H10A 109.5 . . ? 
C1 C10 H10B 109.5 . . ? 
H10A C10 H10B 109.5 . . ? 
C1 C10 H10C 109.5 . . ? 
H10A C10 H10C 109.5 . . ? 
H10B C10 H10C 109.5 . . ? 
C2 B1 C1 58.36(10) . . ? 
C2 B1 B5 105.53(14) . . ? 
C1 B1 B5 105.35(14) . . ? 
C2 B1 B9 58.58(11) . . ? 
C1 B1 B9 105.39(14) . . ? 
B5 B1 B9 60.13(12) . . ? 
C2 B1 B2 105.57(13) . . ? 
C1 B1 B2 58.43(11) . . ? 
B5 B1 B2 60.26(12) . . ? 
B9 B1 B2 108.07(15) . . ? 
C2 B1 H1 123.8 . . ? 
C1 B1 H1 124.0 . . ? 
B5 B1 H1 122.6 . . ? 
B9 B1 H1 122.1 . . ? 
B2 B1 H1 122.0 . . ? 
C1 B2 B1 59.34(11) . . ? 
C1 B2 B5 105.59(14) . . ? 
B1 B2 B5 59.66(12) . . ? 
C1 B2 B6 105.21(14) . . ? 
B1 B2 B6 108.01(15) . . ? 
B5 B2 B6 60.50(12) . . ? 
C1 B2 B3 58.48(11) . . ? 
B1 B2 B3 107.84(14) . . ? 
B5 B2 B3 108.29(15) . . ? 
B6 B2 B3 59.96(12) . . ? 
C1 B2 H2 124.2 . . ? 
B1 B2 H2 121.6 . . ? 
B5 B2 H2 122.0 . . ? 
B6 B2 H2 122.1 . . ? 
B3 B2 H2 121.7 . . ? 
C1 B3 B4 59.24(11) . . ? 
C1 B3 B7 105.54(14) . . ? 
B4 B3 B7 59.84(12) . . ? 
C1 B3 B6 105.36(14) . . ? 
B4 B3 B6 108.25(15) . . ? 
B7 B3 B6 60.44(12) . . ? 
C1 B3 B2 58.66(11) . . ? 
B4 B3 B2 108.01(14) . . ? 
B7 B3 B2 108.24(15) . . ? 
B6 B3 B2 59.98(12) . . ? 
C1 B3 H3 124.2 . . ? 
B4 B3 H3 121.4 . . ? 
B7 B3 H3 122.0 . . ? 
B6 B3 H3 122.0 . . ? 
B2 B3 H3 121.6 . . ? 
C1 B4 C2 58.50(10) . . ? 
C1 B4 B7 105.34(14) . . ? 
C2 B4 B7 105.19(14) . . ? 
C1 B4 B3 58.51(11) . . ? 
C2 B4 B3 105.64(14) . . ? 
B7 B4 B3 60.30(12) . . ? 
C1 B4 B8 105.35(14) . . ? 
C2 B4 B8 58.30(11) . . ? 
B7 B4 B8 60.03(12) . . ? 
B3 B4 B8 108.09(15) . . ? 
C1 B4 H4 123.9 . . ? 
C2 B4 H4 123.9 . . ? 
B7 B4 H4 122.7 . . ? 
B3 B4 H4 121.9 . . ? 
B8 B4 H4 122.2 . . ? 
B1 B5 B9 59.94(12) . . ? 
B1 B5 B2 60.08(12) . . ? 
B9 B5 B2 107.78(14) . . ? 
B1 B5 B10 107.72(15) . . ? 
B9 B5 B10 59.76(12) . . ? 
B2 B5 B10 107.56(15) . . ? 
B1 B5 B6 107.77(14) . . ? 
B9 B5 B6 107.49(15) . . ? 
B2 B5 B6 59.78(12) . . ? 
B10 B5 B6 59.73(12) . . ? 
B1 B5 H5A 121.7 . . ? 
B9 B5 H5A 121.9 . . ? 
B2 B5 H5A 121.9 . . ? 
B10 B5 H5A 122.0 . . ? 
B6 B5 H5A 122.0 . . ? 
B3 B6 B2 60.05(12) . . ? 
B3 B6 B10 107.75(15) . . ? 
B2 B6 B10 107.59(14) . . ? 
B3 B6 B7 59.75(12) . . ? 
B2 B6 B7 107.75(14) . . ? 
B10 B6 B7 60.08(13) . . ? 
B3 B6 B5 107.73(14) . . ? 
B2 B6 B5 59.71(12) . . ? 
B10 B6 B5 59.84(12) . . ? 
B7 B6 B5 107.83(15) . . ? 
B3 B6 H6A 121.9 . . ? 
B2 B6 H6A 121.9 . . ? 
B10 B6 H6A 121.9 . . ? 
B7 B6 H6A 121.8 . . ? 
B5 B6 H6A 121.9 . . ? 
B4 B7 B8 60.13(12) . . ? 
B4 B7 B3 59.86(12) . . ? 
B8 B7 B3 107.82(15) . . ? 
B4 B7 B10 107.91(14) . . ? 
B8 B7 B10 60.00(12) . . ? 
B3 B7 B10 107.46(15) . . ? 
B4 B7 B6 107.77(15) . . ? 
B8 B7 B6 107.76(15) . . ? 
B3 B7 B6 59.81(12) . . ? 
B10 B7 B6 59.66(12) . . ? 
B4 B7 H7 121.7 . . ? 
B8 B7 H7 121.7 . . ? 
B3 B7 H7 122.0 . . ? 
B10 B7 H7 122.0 . . ? 
B6 B7 H7 122.0 . . ? 
C2 B8 B9 58.82(11) . . ? 
C2 B8 B7 105.84(14) . . ? 
B9 B8 B7 108.20(15) . . ? 
C2 B8 B4 59.33(11) . . ? 
B9 B8 B4 107.99(14) . . ? 
B7 B8 B4 59.83(12) . . ? 
C2 B8 B10 105.33(14) . . ? 
B9 B8 B10 59.75(12) . . ? 
B7 B8 B10 60.37(13) . . ? 
B4 B8 B10 107.97(15) . . ? 
C2 B8 H8A 124.0 . . ? 
B9 B8 H8A 121.6 . . ? 
B7 B8 H8A 121.9 . . ? 
B4 B8 H8A 121.5 . . ? 
B10 B8 H8A 122.3 . . ? 
C2 B9 B1 59.44(11) . . ? 
C2 B9 B10 105.63(14) . . ? 
B1 B9 B10 108.22(15) . . ? 
C2 B9 B5 106.04(14) . . ? 
B1 B9 B5 59.93(12) . . ? 
B10 B9 B5 60.42(12) . . ? 
C2 B9 B8 58.61(11) . . ? 
B1 B9 B8 108.15(14) . . ? 
B10 B9 B8 60.34(12) . . ? 
B5 B9 B8 108.72(15) . . ? 
C2 B9 H9A 124.0 . . ? 
B1 B9 H9A 121.4 . . ? 
B10 B9 H9A 122.0 . . ? 
B5 B9 H9A 121.7 . . ? 
B8 B9 H9A 121.4 . . ? 
B9 B10 B6 108.10(15) . . ? 
B9 B10 B8 59.91(12) . . ? 
B6 B10 B8 107.94(15) . . ? 
B9 B10 B5 59.82(12) . . ? 
B6 B10 B5 60.44(12) . . ? 
B8 B10 B5 107.91(15) . . ? 
B9 B10 B7 107.73(15) . . ? 
B6 B10 B7 60.26(12) . . ? 
B8 B10 B7 59.63(12) . . ? 
B5 B10 B7 108.45(15) . . ? 
B9 B10 H10 121.9 . . ? 
B6 B10 H10 121.4 . . ? 
B8 B10 H10 122.0 . . ? 
B5 B10 H10 121.5 . . ? 
B7 B10 H10 121.7 . . ? 
 
loop_ 
 _geom_torsion_atom_site_label_1 
 _geom_torsion_atom_site_label_2 
 _geom_torsion_atom_site_label_3 
 _geom_torsion_atom_site_label_4 
 _geom_torsion 
 _geom_torsion_site_symmetry_1 
 _geom_torsion_site_symmetry_2 
 _geom_torsion_site_symmetry_3 
 _geom_torsion_site_symmetry_4 
 _geom_torsion_publ_flag 
C10 C1 C2 C3 3.2(2) . . . . ? 
B3 C1 C2 C3 149.87(15) . . . . ? 
B2 C1 C2 C3 -142.47(15) . . . . ? 
B4 C1 C2 C3 110.89(17) . . . . ? 
B1 C1 C2 C3 -103.68(16) . . . . ? 
C10 C1 C2 B8 -146.81(16) . . . . ? 
B3 C1 C2 B8 -0.19(18) . . . . ? 
B2 C1 C2 B8 67.47(17) . . . . ? 
B4 C1 C2 B8 -39.17(14) . . . . ? 
B1 C1 C2 B8 106.26(15) . . . . ? 
C10 C1 C2 B9 146.01(16) . . . . ? 
B3 C1 C2 B9 -67.36(17) . . . . ? 
B2 C1 C2 B9 0.29(18) . . . . ? 
B4 C1 C2 B9 -106.35(15) . . . . ? 
B1 C1 C2 B9 39.08(14) . . . . ? 
C10 C1 C2 B4 -107.64(18) . . . . ? 
B3 C1 C2 B4 38.99(13) . . . . ? 
B2 C1 C2 B4 106.64(15) . . . . ? 
B1 C1 C2 B4 145.43(15) . . . . ? 
C10 C1 C2 B1 106.93(17) . . . . ? 
B3 C1 C2 B1 -106.45(15) . . . . ? 
B2 C1 C2 B1 -38.79(14) . . . . ? 
B4 C1 C2 B1 -145.43(15) . . . . ? 
C1 C2 C3 C4 -103.65(18) . . . . ? 
B8 C2 C3 C4 42.6(2) . . . . ? 
B9 C2 C3 C4 116.86(18) . . . . ? 
B4 C2 C3 C4 -32.4(2) . . . . ? 
B1 C2 C3 C4 -172.79(15) . . . . ? 
C2 C3 C4 C9 92.9(2) . . . . ? 
C2 C3 C4 C5 -89.4(2) . . . . ? 
C9 C4 C5 C6 -0.9(3) . . . . ? 
C3 C4 C5 C6 -178.61(17) . . . . ? 
C4 C5 C6 C7 -0.5(3) . . . . ? 
C5 C6 C7 C8 0.8(3) . . . . ? 
C5 C6 C7 I1 -179.55(14) . . . . ? 
C6 C7 C8 C9 0.1(3) . . . . ? 
I1 C7 C8 C9 -179.51(14) . . . . ? 
C5 C4 C9 C8 1.8(3) . . . . ? 
C3 C4 C9 C8 179.59(17) . . . . ? 
C7 C8 C9 C4 -1.5(3) . . . . ? 
C3 C2 B1 C1 111.10(16) . . . . ? 
B8 C2 B1 C1 -100.97(15) . . . . ? 
B9 C2 B1 C1 -137.87(14) . . . . ? 
B4 C2 B1 C1 -32.43(14) . . . . ? 
C3 C2 B1 B5 -150.18(15) . . . . ? 
C1 C2 B1 B5 98.72(15) . . . . ? 
B8 C2 B1 B5 -2.25(19) . . . . ? 
B9 C2 B1 B5 -39.15(14) . . . . ? 
B4 C2 B1 B5 66.28(18) . . . . ? 
C3 C2 B1 B9 -111.03(17) . . . . ? 
C1 C2 B1 B9 137.87(14) . . . . ? 
B8 C2 B1 B9 36.90(14) . . . . ? 
B4 C2 B1 B9 105.44(16) . . . . ? 
C3 C2 B1 B2 147.01(15) . . . . ? 
C1 C2 B1 B2 35.91(13) . . . . ? 
B8 C2 B1 B2 -65.06(18) . . . . ? 
B9 C2 B1 B2 -101.96(15) . . . . ? 
B4 C2 B1 B2 3.48(19) . . . . ? 
C10 C1 B1 C2 -109.85(17) . . . . ? 
B3 C1 B1 C2 101.11(15) . . . . ? 
B2 C1 B1 C2 138.46(14) . . . . ? 
B4 C1 B1 C2 32.58(14) . . . . ? 
C10 C1 B1 B5 151.11(16) . . . . ? 
C2 C1 B1 B5 -99.04(15) . . . . ? 
B3 C1 B1 B5 2.07(19) . . . . ? 
B2 C1 B1 B5 39.42(14) . . . . ? 
B4 C1 B1 B5 -66.46(18) . . . . ? 
C10 C1 B1 B9 -146.28(16) . . . . ? 
C2 C1 B1 B9 -36.43(13) . . . . ? 
B3 C1 B1 B9 64.68(18) . . . . ? 
B2 C1 B1 B9 102.03(15) . . . . ? 
B4 C1 B1 B9 -3.85(19) . . . . ? 
C10 C1 B1 B2 111.69(17) . . . . ? 
C2 C1 B1 B2 -138.46(14) . . . . ? 
B3 C1 B1 B2 -37.35(14) . . . . ? 
B4 C1 B1 B2 -105.88(16) . . . . ? 
C10 C1 B2 B1 -107.11(18) . . . . ? 
C2 C1 B2 B1 38.16(13) . . . . ? 
B3 C1 B2 B1 141.38(15) . . . . ? 
B4 C1 B2 B1 104.44(16) . . . . ? 
C10 C1 B2 B5 -146.31(16) . . . . ? 
C2 C1 B2 B5 -1.03(18) . . . . ? 
B3 C1 B2 B5 102.19(15) . . . . ? 
B4 C1 B2 B5 65.24(18) . . . . ? 
B1 C1 B2 B5 -39.19(13) . . . . ? 
C10 C1 B2 B6 150.68(16) . . . . ? 
C2 C1 B2 B6 -64.04(17) . . . . ? 
B3 C1 B2 B6 39.18(14) . . . . ? 
B4 C1 B2 B6 2.24(19) . . . . ? 
B1 C1 B2 B6 -102.20(15) . . . . ? 
C10 C1 B2 B3 111.50(18) . . . . ? 
C2 C1 B2 B3 -103.22(15) . . . . ? 
B4 C1 B2 B3 -36.95(14) . . . . ? 
B1 C1 B2 B3 -141.38(15) . . . . ? 
C2 B1 B2 C1 -35.88(13) . . . . ? 
B5 B1 B2 C1 -135.15(15) . . . . ? 
B9 B1 B2 C1 -97.31(15) . . . . ? 
C2 B1 B2 B5 99.27(15) . . . . ? 
C1 B1 B2 B5 135.15(15) . . . . ? 
B9 B1 B2 B5 37.84(14) . . . . ? 
C2 B1 B2 B6 61.47(17) . . . . ? 
C1 B1 B2 B6 97.35(15) . . . . ? 
B5 B1 B2 B6 -37.80(14) . . . . ? 
B9 B1 B2 B6 0.04(19) . . . . ? 
C2 B1 B2 B3 -1.90(19) . . . . ? 
C1 B1 B2 B3 33.98(13) . . . . ? 
B5 B1 B2 B3 -101.17(16) . . . . ? 
B9 B1 B2 B3 -63.33(18) . . . . ? 
C10 C1 B3 B4 107.62(18) . . . . ? 
C2 C1 B3 B4 -38.40(13) . . . . ? 
B2 C1 B3 B4 -141.61(15) . . . . ? 
B1 C1 B3 B4 -104.51(16) . . . . ? 
C10 C1 B3 B7 147.04(16) . . . . ? 
C2 C1 B3 B7 1.03(18) . . . . ? 
B2 C1 B3 B7 -102.18(16) . . . . ? 
B4 C1 B3 B7 39.43(14) . . . . ? 
B1 C1 B3 B7 -65.08(18) . . . . ? 
C10 C1 B3 B6 -150.00(16) . . . . ? 
C2 C1 B3 B6 63.99(17) . . . . ? 
B2 C1 B3 B6 -39.22(14) . . . . ? 
B4 C1 B3 B6 102.39(15) . . . . ? 
B1 C1 B3 B6 -2.12(19) . . . . ? 
C10 C1 B3 B2 -110.77(18) . . . . ? 
C2 C1 B3 B2 103.21(15) . . . . ? 
B4 C1 B3 B2 141.61(15) . . . . ? 
B1 C1 B3 B2 37.10(14) . . . . ? 
B1 B2 B3 C1 -34.33(13) . . . . ? 
B5 B2 B3 C1 -97.43(15) . . . . ? 
B6 B2 B3 C1 -135.23(15) . . . . ? 
C1 B2 B3 B4 34.13(13) . . . . ? 
B1 B2 B3 B4 -0.2(2) . . . . ? 
B5 B2 B3 B4 -63.29(18) . . . . ? 
B6 B2 B3 B4 -101.10(16) . . . . ? 
C1 B2 B3 B7 97.45(15) . . . . ? 
B1 B2 B3 B7 63.12(18) . . . . ? 
B5 B2 B3 B7 0.02(19) . . . . ? 
B6 B2 B3 B7 -37.78(14) . . . . ? 
C1 B2 B3 B6 135.23(15) . . . . ? 
B1 B2 B3 B6 100.90(16) . . . . ? 
B5 B2 B3 B6 37.81(14) . . . . ? 
C10 C1 B4 C2 109.67(17) . . . . ? 
B3 C1 B4 C2 -138.26(14) . . . . ? 
B2 C1 B4 C2 -101.08(15) . . . . ? 
B1 C1 B4 C2 -32.53(14) . . . . ? 
C10 C1 B4 B7 -151.66(16) . . . . ? 
C2 C1 B4 B7 98.66(15) . . . . ? 
B3 C1 B4 B7 -39.60(14) . . . . ? 
B2 C1 B4 B7 -2.41(19) . . . . ? 
B1 C1 B4 B7 66.13(18) . . . . ? 
C10 C1 B4 B3 -112.07(17) . . . . ? 
C2 C1 B4 B3 138.26(14) . . . . ? 
B2 C1 B4 B3 37.18(14) . . . . ? 
B1 C1 B4 B3 105.72(16) . . . . ? 
C10 C1 B4 B8 145.84(16) . . . . ? 
C2 C1 B4 B8 36.16(13) . . . . ? 
B3 C1 B4 B8 -102.09(15) . . . . ? 
B2 C1 B4 B8 -64.91(18) . . . . ? 
B1 C1 B4 B8 3.63(19) . . . . ? 
C3 C2 B4 C1 -108.57(17) . . . . ? 
B8 C2 B4 C1 138.02(15) . . . . ? 
B9 C2 B4 C1 100.63(15) . . . . ? 
B1 C2 B4 C1 32.52(14) . . . . ? 
C3 C2 B4 B7 152.51(16) . . . . ? 
C1 C2 B4 B7 -98.92(15) . . . . ? 
B8 C2 B4 B7 39.10(14) . . . . ? 
B9 C2 B4 B7 1.71(19) . . . . ? 
B1 C2 B4 B7 -66.40(18) . . . . ? 
C3 C2 B4 B3 -144.70(16) . . . . ? 
C1 C2 B4 B3 -36.13(13) . . . . ? 
B8 C2 B4 B3 101.89(16) . . . . ? 
B9 C2 B4 B3 64.50(18) . . . . ? 
B1 C2 B4 B3 -3.60(19) . . . . ? 
C3 C2 B4 B8 113.41(18) . . . . ? 
C1 C2 B4 B8 -138.02(15) . . . . ? 
B9 C2 B4 B8 -37.39(14) . . . . ? 
B1 C2 B4 B8 -105.50(16) . . . . ? 
B7 B3 B4 C1 -134.96(15) . . . . ? 
B6 B3 B4 C1 -97.37(15) . . . . ? 
B2 B3 B4 C1 -33.90(13) . . . . ? 
C1 B3 B4 C2 36.12(13) . . . . ? 
B7 B3 B4 C2 -98.84(15) . . . . ? 
B6 B3 B4 C2 -61.25(17) . . . . ? 
B2 B3 B4 C2 2.22(19) . . . . ? 
C1 B3 B4 B7 134.96(15) . . . . ? 
B6 B3 B4 B7 37.58(14) . . . . ? 
B2 B3 B4 B7 101.05(16) . . . . ? 
C1 B3 B4 B8 97.26(15) . . . . ? 
B7 B3 B4 B8 -37.69(14) . . . . ? 
B6 B3 B4 B8 -0.11(19) . . . . ? 
B2 B3 B4 B8 63.36(18) . . . . ? 
C2 B1 B5 B9 38.42(13) . . . . ? 
C1 B1 B5 B9 99.19(15) . . . . ? 
B2 B1 B5 B9 137.74(15) . . . . ? 
C2 B1 B5 B2 -99.32(15) . . . . ? 
C1 B1 B5 B2 -38.55(13) . . . . ? 
B9 B1 B5 B2 -137.74(15) . . . . ? 
C2 B1 B5 B10 1.14(19) . . . . ? 
C1 B1 B5 B10 61.91(18) . . . . ? 
B9 B1 B5 B10 -37.28(14) . . . . ? 
B2 B1 B5 B10 100.46(16) . . . . ? 
C2 B1 B5 B6 -61.90(18) . . . . ? 
C1 B1 B5 B6 -1.13(19) . . . . ? 
B9 B1 B5 B6 -100.32(16) . . . . ? 
B2 B1 B5 B6 37.42(14) . . . . ? 
C1 B2 B5 B1 39.04(13) . . . . ? 
B6 B2 B5 B1 137.96(15) . . . . ? 
B3 B2 B5 B1 100.39(15) . . . . ? 
C1 B2 B5 B9 1.36(19) . . . . ? 
B1 B2 B5 B9 -37.68(14) . . . . ? 
B6 B2 B5 B9 100.28(16) . . . . ? 
B3 B2 B5 B9 62.72(18) . . . . ? 
C1 B2 B5 B10 -61.69(17) . . . . ? 
B1 B2 B5 B10 -100.73(15) . . . . ? 
B6 B2 B5 B10 37.23(14) . . . . ? 
B3 B2 B5 B10 -0.33(19) . . . . ? 
C1 B2 B5 B6 -98.92(15) . . . . ? 
B1 B2 B5 B6 -137.96(15) . . . . ? 
B3 B2 B5 B6 -37.57(14) . . . . ? 
C1 B3 B6 B2 38.59(13) . . . . ? 
B4 B3 B6 B2 100.69(15) . . . . ? 
B7 B3 B6 B2 138.01(15) . . . . ? 
C1 B3 B6 B10 -61.88(18) . . . . ? 
B4 B3 B6 B10 0.22(19) . . . . ? 
B7 B3 B6 B10 37.54(14) . . . . ? 
B2 B3 B6 B10 -100.47(16) . . . . ? 
C1 B3 B6 B7 -99.42(15) . . . . ? 
B4 B3 B6 B7 -37.32(14) . . . . ? 
B2 B3 B6 B7 -138.01(15) . . . . ? 
C1 B3 B6 B5 1.28(19) . . . . ? 
B4 B3 B6 B5 63.38(18) . . . . ? 
B7 B3 B6 B5 100.70(16) . . . . ? 
B2 B3 B6 B5 -37.31(14) . . . . ? 
C1 B2 B6 B3 -38.47(13) . . . . ? 
B1 B2 B6 B3 -100.61(15) . . . . ? 
B5 B2 B6 B3 -138.04(15) . . . . ? 
C1 B2 B6 B10 62.28(18) . . . . ? 
B1 B2 B6 B10 0.13(19) . . . . ? 
B5 B2 B6 B10 -37.29(14) . . . . ? 
B3 B2 B6 B10 100.75(16) . . . . ? 
C1 B2 B6 B7 -1.11(19) . . . . ? 
B1 B2 B6 B7 -63.25(18) . . . . ? 
B5 B2 B6 B7 -100.68(16) . . . . ? 
B3 B2 B6 B7 37.36(14) . . . . ? 
C1 B2 B6 B5 99.57(15) . . . . ? 
B1 B2 B6 B5 37.42(14) . . . . ? 
B3 B2 B6 B5 138.04(15) . . . . ? 
B1 B5 B6 B3 -0.1(2) . . . . ? 
B9 B5 B6 B3 -63.31(18) . . . . ? 
B2 B5 B6 B3 37.47(14) . . . . ? 
B10 B5 B6 B3 -100.63(16) . . . . ? 
B1 B5 B6 B2 -37.55(14) . . . . ? 
B9 B5 B6 B2 -100.78(15) . . . . ? 
B10 B5 B6 B2 -138.09(15) . . . . ? 
B1 B5 B6 B10 100.54(16) . . . . ? 
B9 B5 B6 B10 37.32(14) . . . . ? 
B2 B5 B6 B10 138.09(15) . . . . ? 
B1 B5 B6 B7 63.00(19) . . . . ? 
B9 B5 B6 B7 -0.2(2) . . . . ? 
B2 B5 B6 B7 100.55(16) . . . . ? 
B10 B5 B6 B7 -37.54(14) . . . . ? 
C1 B4 B7 B8 -99.13(15) . . . . ? 
C2 B4 B7 B8 -38.27(13) . . . . ? 
B3 B4 B7 B8 -137.87(15) . . . . ? 
C1 B4 B7 B3 38.74(13) . . . . ? 
C2 B4 B7 B3 99.59(14) . . . . ? 
B8 B4 B7 B3 137.87(15) . . . . ? 
C1 B4 B7 B10 -61.46(18) . . . . ? 
C2 B4 B7 B10 -0.60(18) . . . . ? 
B3 B4 B7 B10 -100.19(16) . . . . ? 
B8 B4 B7 B10 37.67(14) . . . . ? 
C1 B4 B7 B6 1.55(19) . . . . ? 
C2 B4 B7 B6 62.41(18) . . . . ? 
B3 B4 B7 B6 -37.18(14) . . . . ? 
B8 B4 B7 B6 100.68(16) . . . . ? 
C1 B3 B7 B4 -39.14(13) . . . . ? 
B6 B3 B7 B4 -138.25(15) . . . . ? 
B2 B3 B7 B4 -100.67(15) . . . . ? 
C1 B3 B7 B8 -1.47(19) . . . . ? 
B4 B3 B7 B8 37.67(14) . . . . ? 
B6 B3 B7 B8 -100.58(16) . . . . ? 
B2 B3 B7 B8 -63.00(18) . . . . ? 
C1 B3 B7 B10 61.83(17) . . . . ? 
B4 B3 B7 B10 100.96(15) . . . . ? 
B6 B3 B7 B10 -37.28(14) . . . . ? 
B2 B3 B7 B10 0.30(19) . . . . ? 
C1 B3 B7 B6 99.11(15) . . . . ? 
B4 B3 B7 B6 138.25(15) . . . . ? 
B2 B3 B7 B6 37.58(14) . . . . ? 
B3 B6 B7 B4 37.21(14) . . . . ? 
B2 B6 B7 B4 -0.3(2) . . . . ? 
B10 B6 B7 B4 -100.76(16) . . . . ? 
B5 B6 B7 B4 -63.32(19) . . . . ? 
B3 B6 B7 B8 100.69(16) . . . . ? 
B2 B6 B7 B8 63.20(19) . . . . ? 
B10 B6 B7 B8 -37.28(14) . . . . ? 
B5 B6 B7 B8 0.2(2) . . . . ? 
B2 B6 B7 B3 -37.49(14) . . . . ? 
B10 B6 B7 B3 -137.97(15) . . . . ? 
B5 B6 B7 B3 -100.53(16) . . . . ? 
B3 B6 B7 B10 137.97(15) . . . . ? 
B2 B6 B7 B10 100.48(16) . . . . ? 
B5 B6 B7 B10 37.43(14) . . . . ? 
C3 C2 B8 B9 108.39(18) . . . . ? 
C1 C2 B8 B9 -102.74(15) . . . . ? 
B4 C2 B8 B9 -141.14(15) . . . . ? 
B1 C2 B8 B9 -36.67(14) . . . . ? 
C3 C2 B8 B7 -149.62(16) . . . . ? 
C1 C2 B8 B7 -0.75(19) . . . . ? 
B9 C2 B8 B7 101.99(16) . . . . ? 
B4 C2 B8 B7 -39.15(14) . . . . ? 
B1 C2 B8 B7 65.32(18) . . . . ? 
C3 C2 B8 B4 -110.47(18) . . . . ? 
C1 C2 B8 B4 38.40(13) . . . . ? 
B9 C2 B8 B4 141.14(15) . . . . ? 
B1 C2 B8 B4 104.47(15) . . . . ? 
C3 C2 B8 B10 147.45(16) . . . . ? 
C1 C2 B8 B10 -63.68(17) . . . . ? 
B9 C2 B8 B10 39.06(14) . . . . ? 
B4 C2 B8 B10 -102.08(16) . . . . ? 
B1 C2 B8 B10 2.39(19) . . . . ? 
B4 B7 B8 C2 38.91(13) . . . . ? 
B3 B7 B8 C2 1.36(19) . . . . ? 
B10 B7 B8 C2 -98.91(15) . . . . ? 
B6 B7 B8 C2 -61.78(18) . . . . ? 
B4 B7 B8 B9 100.66(16) . . . . ? 
B3 B7 B8 B9 63.12(19) . . . . ? 
B10 B7 B8 B9 -37.16(14) . . . . ? 
B6 B7 B8 B9 0.0(2) . . . . ? 
B3 B7 B8 B4 -37.55(14) . . . . ? 
B10 B7 B8 B4 -137.82(15) . . . . ? 
B6 B7 B8 B4 -100.69(16) . . . . ? 
B4 B7 B8 B10 137.82(15) . . . . ? 
B3 B7 B8 B10 100.27(16) . . . . ? 
B6 B7 B8 B10 37.13(14) . . . . ? 
C1 B4 B8 C2 -36.25(13) . . . . ? 
B7 B4 B8 C2 -135.37(15) . . . . ? 
B3 B4 B8 C2 -97.56(15) . . . . ? 
C1 B4 B8 B9 -1.90(19) . . . . ? 
C2 B4 B8 B9 34.36(13) . . . . ? 
B7 B4 B8 B9 -101.01(16) . . . . ? 
B3 B4 B8 B9 -63.20(18) . . . . ? 
C1 B4 B8 B7 99.11(15) . . . . ? 
C2 B4 B8 B7 135.37(15) . . . . ? 
B3 B4 B8 B7 37.81(14) . . . . ? 
C1 B4 B8 B10 61.26(17) . . . . ? 
C2 B4 B8 B10 97.52(15) . . . . ? 
B7 B4 B8 B10 -37.85(14) . . . . ? 
B3 B4 B8 B10 -0.04(19) . . . . ? 
C3 C2 B9 B1 104.31(17) . . . . ? 
C1 C2 B9 B1 -38.59(13) . . . . ? 
B8 C2 B9 B1 -141.64(15) . . . . ? 
B4 C2 B9 B1 -104.33(15) . . . . ? 
C3 C2 B9 B10 -153.45(15) . . . . ? 
C1 C2 B9 B10 63.64(17) . . . . ? 
B8 C2 B9 B10 -39.40(14) . . . . ? 
B4 C2 B9 B10 -2.10(19) . . . . ? 
B1 C2 B9 B10 102.24(15) . . . . ? 
C3 C2 B9 B5 143.49(15) . . . . ? 
C1 C2 B9 B5 0.58(18) . . . . ? 
B8 C2 B9 B5 -102.47(15) . . . . ? 
B4 C2 B9 B5 -65.16(18) . . . . ? 
B1 C2 B9 B5 39.17(14) . . . . ? 
C3 C2 B9 B8 -114.05(17) . . . . ? 
C1 C2 B9 B8 103.05(15) . . . . ? 
B4 C2 B9 B8 37.31(14) . . . . ? 
B1 C2 B9 B8 141.64(15) . . . . ? 
C1 B1 B9 C2 36.33(12) . . . . ? 
B5 B1 B9 C2 135.45(15) . . . . ? 
B2 B1 B9 C2 97.56(15) . . . . ? 
C2 B1 B9 B10 -97.76(15) . . . . ? 
C1 B1 B9 B10 -61.43(17) . . . . ? 
B5 B1 B9 B10 37.70(14) . . . . ? 
B2 B1 B9 B10 -0.20(19) . . . . ? 
C2 B1 B9 B5 -135.45(15) . . . . ? 
C1 B1 B9 B5 -99.12(15) . . . . ? 
B2 B1 B9 B5 -37.89(14) . . . . ? 
C2 B1 B9 B8 -33.88(13) . . . . ? 
C1 B1 B9 B8 2.44(18) . . . . ? 
B5 B1 B9 B8 101.57(16) . . . . ? 
B2 B1 B9 B8 63.67(18) . . . . ? 
B1 B5 B9 C2 -38.94(13) . . . . ? 
B2 B5 B9 C2 -1.20(19) . . . . ? 
B10 B5 B9 C2 99.16(15) . . . . ? 
B6 B5 B9 C2 61.86(18) . . . . ? 
B2 B5 B9 B1 37.74(13) . . . . ? 
B10 B5 B9 B1 138.10(15) . . . . ? 
B6 B5 B9 B1 100.80(15) . . . . ? 
B1 B5 B9 B10 -138.10(15) . . . . ? 
B2 B5 B9 B10 -100.36(16) . . . . ? 
B6 B5 B9 B10 -37.30(14) . . . . ? 
B1 B5 B9 B8 -100.59(15) . . . . ? 
B2 B5 B9 B8 -62.85(18) . . . . ? 
B10 B5 B9 B8 37.51(14) . . . . ? 
B6 B5 B9 B8 0.21(19) . . . . ? 
B7 B8 B9 C2 -97.86(16) . . . . ? 
B4 B8 B9 C2 -34.57(13) . . . . ? 
B10 B8 B9 C2 -135.29(15) . . . . ? 
C2 B8 B9 B1 34.22(13) . . . . ? 
B7 B8 B9 B1 -63.64(18) . . . . ? 
B4 B8 B9 B1 -0.35(19) . . . . ? 
B10 B8 B9 B1 -101.07(16) . . . . ? 
C2 B8 B9 B10 135.29(15) . . . . ? 
B7 B8 B9 B10 37.43(15) . . . . ? 
B4 B8 B9 B10 100.72(16) . . . . ? 
C2 B8 B9 B5 97.75(15) . . . . ? 
B7 B8 B9 B5 -0.1(2) . . . . ? 
B4 B8 B9 B5 63.18(18) . . . . ? 
B10 B8 B9 B5 -37.54(14) . . . . ? 
C2 B9 B10 B6 -62.09(18) . . . . ? 
B1 B9 B10 B6 0.3(2) . . . . ? 
B5 B9 B10 B6 37.76(14) . . . . ? 
B8 B9 B10 B6 -100.66(16) . . . . ? 
C2 B9 B10 B8 38.58(13) . . . . ? 
B1 B9 B10 B8 100.95(15) . . . . ? 
B5 B9 B10 B8 138.43(15) . . . . ? 
C2 B9 B10 B5 -99.85(15) . . . . ? 
B1 B9 B10 B5 -37.48(14) . . . . ? 
B8 B9 B10 B5 -138.43(15) . . . . ? 
C2 B9 B10 B7 1.59(19) . . . . ? 
B1 B9 B10 B7 63.96(18) . . . . ? 
B5 B9 B10 B7 101.44(16) . . . . ? 
B8 B9 B10 B7 -36.99(14) . . . . ? 
B3 B6 B10 B9 63.10(19) . . . . ? 
B2 B6 B10 B9 -0.3(2) . . . . ? 
B7 B6 B10 B9 100.50(16) . . . . ? 
B5 B6 B10 B9 -37.49(14) . . . . ? 
B3 B6 B10 B8 -0.2(2) . . . . ? 
B2 B6 B10 B8 -63.60(18) . . . . ? 
B7 B6 B10 B8 37.15(14) . . . . ? 
B5 B6 B10 B8 -100.84(16) . . . . ? 
B3 B6 B10 B5 100.59(15) . . . . ? 
B2 B6 B10 B5 37.23(14) . . . . ? 
B7 B6 B10 B5 137.99(15) . . . . ? 
B3 B6 B10 B7 -37.40(14) . . . . ? 
B2 B6 B10 B7 -100.76(16) . . . . ? 
B5 B6 B10 B7 -137.99(15) . . . . ? 
C2 B8 B10 B9 -38.61(13) . . . . ? 
B7 B8 B10 B9 -138.38(15) . . . . ? 
B4 B8 B10 B9 -100.77(15) . . . . ? 
C2 B8 B10 B6 62.33(18) . . . . ? 
B9 B8 B10 B6 100.94(16) . . . . ? 
B7 B8 B10 B6 -37.43(14) . . . . ? 
B4 B8 B10 B6 0.18(19) . . . . ? 
C2 B8 B10 B5 -1.54(19) . . . . ? 
B9 B8 B10 B5 37.07(14) . . . . ? 
B7 B8 B10 B5 -101.30(16) . . . . ? 
B4 B8 B10 B5 -63.69(18) . . . . ? 
C2 B8 B10 B7 99.76(15) . . . . ? 
B9 B8 B10 B7 138.38(15) . . . . ? 
B4 B8 B10 B7 37.61(14) . . . . ? 
B1 B5 B10 B9 37.36(14) . . . . ? 
B2 B5 B10 B9 100.74(15) . . . . ? 
B6 B5 B10 B9 137.99(15) . . . . ? 
B1 B5 B10 B6 -100.63(16) . . . . ? 
B9 B5 B10 B6 -137.99(15) . . . . ? 
B2 B5 B10 B6 -37.26(14) . . . . ? 
B1 B5 B10 B8 0.2(2) . . . . ? 
B9 B5 B10 B8 -37.11(14) . . . . ? 
B2 B5 B10 B8 63.62(18) . . . . ? 
B6 B5 B10 B8 100.88(16) . . . . ? 
B1 B5 B10 B7 -62.86(19) . . . . ? 
B9 B5 B10 B7 -100.22(16) . . . . ? 
B2 B5 B10 B7 0.52(19) . . . . ? 
B6 B5 B10 B7 37.78(14) . . . . ? 
B4 B7 B10 B9 -0.6(2) . . . . ? 
B8 B7 B10 B9 37.11(14) . . . . ? 
B3 B7 B10 B9 -63.78(18) . . . . ? 
B6 B7 B10 B9 -101.13(16) . . . . ? 
B4 B7 B10 B6 100.51(16) . . . . ? 
B8 B7 B10 B6 138.24(15) . . . . ? 
B3 B7 B10 B6 37.35(14) . . . . ? 
B4 B7 B10 B8 -37.73(14) . . . . ? 
B3 B7 B10 B8 -100.89(16) . . . . ? 
B6 B7 B10 B8 -138.24(15) . . . . ? 
B4 B7 B10 B5 62.66(18) . . . . ? 
B8 B7 B10 B5 100.38(16) . . . . ? 
B3 B7 B10 B5 -0.51(19) . . . . ? 
B6 B7 B10 B5 -37.85(14) . . . . ? 
 
_diffrn_measured_fraction_theta_max    0.913 
_diffrn_reflns_theta_full              25.0 
_diffrn_measured_fraction_theta_full   0.999 
_refine_diff_density_max    0.60 
_refine_diff_density_min   -1.04 
_refine_diff_density_rms    0.083 
# END OF CIF for Compound10

data_Compound14
 
_audit_creation_method            SHELXL-97 
_chemical_name_systematic 
; 
 ? 
; 
_chemical_name_common             ? 
_chemical_melting_point           ? 
_chemical_compound_source          'local laboratory'
_chemical_formula_moiety    'C14 H22 B10 S' 
_chemical_formula_sum       'C14 H22 B10 S' 
_chemical_formula_weight          330.48 
 
loop_ 
 _atom_type_symbol 
 _atom_type_description 
 _atom_type_scat_dispersion_real 
 _atom_type_scat_dispersion_imag 
 _atom_type_scat_source 
 'C'  'C'   0.0033   0.0016 
 'International Tables Vol C Tables 4.2.6.8 and 6.1.1.4' 
 'H'  'H'   0.0000   0.0000 
 'International Tables Vol C Tables 4.2.6.8 and 6.1.1.4' 
 'B'  'B'   0.0013   0.0007 
 'International Tables Vol C Tables 4.2.6.8 and 6.1.1.4' 
 'S'  'S'   0.1246   0.1234 
 'International Tables Vol C Tables 4.2.6.8 and 6.1.1.4' 
 
_symmetry_space_group_name_H-M 'P 21/c        '
_symmetry_space_group_name_Hall    '-P 2ybc'   
_symmetry_cell_setting 'Monoclinic'
 
loop_ 
 _symmetry_equiv_pos_as_xyz 
 'x, y, z' 
 '-x, y+1/2, -z+1/2' 
 '-x, -y, -z' 
 'x, -y-1/2, z-1/2' 
 
_cell_length_a                    18.803(3) 
_cell_length_b                    7.8137(12) 
_cell_length_c                    12.159(2) 
_cell_angle_alpha                 90
_cell_angle_beta                  101.279(7) 
_cell_angle_gamma                 90
_cell_volume                      1751.9(5) 
_cell_formula_units_Z             4 
_cell_measurement_temperature     90
_cell_measurement_reflns_used     4059
_cell_measurement_theta_min        2.5
_cell_measurement_theta_max        30.8
 
_exptl_crystal_description        lath 
_exptl_crystal_colour             colorless
_exptl_crystal_size_max           0.40 
_exptl_crystal_size_mid           0.15 
_exptl_crystal_size_min           0.07 
_exptl_crystal_density_meas       ? 
_exptl_crystal_density_diffrn     1.253 
_exptl_crystal_density_method     'not measured' 
_exptl_crystal_F_000              688 
_exptl_absorpt_coefficient_mu     0.176 
_exptl_absorpt_correction_type    'multi-scan' 
_exptl_absorpt_correction_T_min   0.933 
_exptl_absorpt_correction_T_max   0.988 
_exptl_absorpt_process_details    
    'Denzo and Scalepack (Otwinowski & Minor, 1997)' 
 
_exptl_special_details 
; 
 ? 
; 
 
_diffrn_ambient_temperature       90
_diffrn_radiation_wavelength      0.71073 
_diffrn_radiation_type            MoK\a 
_diffrn_radiation_source          'fine-focus sealed tube' 
_diffrn_radiation_monochromator   graphite 
_diffrn_measurement_device_type   'Nonius KappaCCD (with Oxford Cryostream)'
_diffrn_measurement_method              ' \w scans with \k offsets'
_diffrn_detector_area_resol_mean  ? 
_diffrn_standards_number          0 
_diffrn_standards_interval_count  ? 
_diffrn_standards_interval_time   ? 
_diffrn_standards_decay_%         <2 
_diffrn_reflns_number             19953
_diffrn_reflns_av_R_equivalents   0.025 
_diffrn_reflns_av_sigmaI/netI     0.0418 
_diffrn_reflns_limit_h_min        -27 
_diffrn_reflns_limit_h_max        27 
_diffrn_reflns_limit_k_min        -10 
_diffrn_reflns_limit_k_max        10 
_diffrn_reflns_limit_l_min        -16 
_diffrn_reflns_limit_l_max        17 
_diffrn_reflns_theta_min          2.8 
_diffrn_reflns_theta_max          30.8 
_reflns_number_total              5425 
_reflns_number_gt                 4272 
_reflns_threshold_expression      I>2\s(I) 
 
_computing_data_collection        'COLLECT (Nonius, 2000)' 
_computing_cell_refinement
                           'Denzo and Scalepack (Otwinowski & Minor, 1997)'
_computing_data_reduction
                           'Denzo and Scalepack (Otwinowski & Minor, 1997)'
_computing_structure_solution     'SIR97 (Altomare  et al., 1999)'
_computing_structure_refinement         'SHELXL-97 (Sheldrick, 1997)'
_computing_molecular_graphics           'Ortep-3 for Windows (Farrugia, 1997)'
_computing_publication_material    'SHELXL-97 (Sheldrick, 1997)' 
 
_refine_special_details 
; 
 Refinement of F^2^ against ALL reflections.  The weighted R-factor wR and 
 goodness of fit S are based on F^2^, conventional R-factors R are based 
 on F, with F set to zero for negative F^2^. The threshold expression of 
 F^2^ > 2sigma(F^2^) is used only for calculating R-factors(gt) etc. and is 
 not relevant to the choice of reflections for refinement.  R-factors based 
 on F^2^ are statistically about twice as large as those based on F, and R- 
 factors based on ALL data will be even larger. 
; 
 
_refine_ls_structure_factor_coef  Fsqd  
_refine_ls_matrix_type            full 
_refine_ls_weighting_scheme       calc  
_refine_ls_weighting_details 
 'calc w=1/[\s^2^(Fo^2^)+(0.0498P)^2^+1.0135P] where P=(Fo^2^+2Fc^2^)/3' 
_atom_sites_solution_primary      direct 
_atom_sites_solution_secondary    difmap 
_atom_sites_solution_hydrogens    geom 
_refine_ls_hydrogen_treatment     constr
_refine_ls_extinction_method      SHELXL 
_refine_ls_extinction_coef        0.0037(11) 
_refine_ls_extinction_expression 
 'Fc^*^=kFc[1+0.001xFc^2^\l^3^/sin(2\q)]^-1/4^' 
_refine_ls_number_reflns          5425 
_refine_ls_number_parameters      236 
_refine_ls_number_restraints      0 
_refine_ls_R_factor_all           0.064
_refine_ls_R_factor_gt            0.046 
_refine_ls_wR_factor_ref          0.119 
_refine_ls_wR_factor_gt           0.109 
_refine_ls_goodness_of_fit_ref    1.022 
_refine_ls_restrained_S_all       1.022 
_refine_ls_shift/su_max           0.000 
_refine_ls_shift/su_mean          0.000 
 
loop_ 
 _atom_site_label 
 _atom_site_type_symbol 
 _atom_site_fract_x 
 _atom_site_fract_y 
 _atom_site_fract_z 
 _atom_site_U_iso_or_equiv 
 _atom_site_adp_type 
 _atom_site_occupancy 
 _atom_site_symmetry_multiplicity 
 _atom_site_calc_flag 
 _atom_site_refinement_flags 
 _atom_site_disorder_assembly 
 _atom_site_disorder_group 
S1 S 0.61923(7) 0.9584(2) 0.83658(12) 0.0169(2) Uani 0.5185(19) 1 d P A 1 
C4 C 0.6468(3) 0.8278(7) 0.7373(4) 0.0231(11) Uiso 0.5185(19) 1 d P A 1 
H4 H 0.6946 0.7843 0.7435 0.028 Uiso 0.5185(19) 1 calc PR A 1 
S1A S 0.66187(6) 0.83740(13) 0.75796(9) 0.0163(2) Uani 0.4815(19) 1 d P A 2 
C4A C 0.6071(4) 0.9565(11) 0.8260(7) 0.0231(11) Uiso 0.4815(19) 1 d P A 2 
H4A H 0.6229 1.0104 0.8965 0.028 Uiso 0.4815(19) 1 calc PR A 2 
C1 C 0.53513(7) 0.96407(17) 0.76313(11) 0.0173(3) Uani 1 1 d . . . 
H1 H 0.4968 1.0240 0.7868 0.021 Uiso 1 1 calc R A 1 
C2 C 0.52620(6) 0.87171(16) 0.66262(10) 0.0131(2) Uani 1 1 d . A . 
C3 C 0.59190(7) 0.79578(17) 0.64984(11) 0.0158(2) Uani 1 1 d . . . 
H3 H 0.5971 0.7291 0.5866 0.019 Uiso 1 1 calc R A 1 
C5 C 0.45668(6) 0.85469(15) 0.58214(10) 0.0123(2) Uani 1 1 d . . . 
C6 C 0.39434(7) 0.94091(16) 0.59871(11) 0.0148(2) Uani 1 1 d . A . 
H6 H 0.3970 1.0134 0.6621 0.018 Uiso 1 1 calc R . . 
C7 C 0.32877(7) 0.92249(16) 0.52429(11) 0.0148(2) Uani 1 1 d . . . 
H7 H 0.2873 0.9824 0.5377 0.018 Uiso 1 1 calc R A . 
C8 C 0.32261(6) 0.81743(15) 0.43000(10) 0.0129(2) Uani 1 1 d . A . 
C9 C 0.38471(7) 0.73421(16) 0.41154(10) 0.0148(2) Uani 1 1 d . . . 
H9 H 0.3821 0.6642 0.3470 0.018 Uiso 1 1 calc R A . 
C10 C 0.45068(7) 0.75209(16) 0.48639(11) 0.0151(2) Uani 1 1 d . A . 
H10 H 0.4922 0.6936 0.4722 0.018 Uiso 1 1 calc R . . 
C11 C 0.25194(7) 0.80315(16) 0.34658(11) 0.0146(2) Uani 1 1 d . . . 
H11A H 0.2632 0.7970 0.2705 0.018 Uiso 1 1 calc R A . 
H11B H 0.2241 0.9098 0.3504 0.018 Uiso 1 1 calc R . . 
C12 C 0.20280(6) 0.65126(15) 0.36060(10) 0.0115(2) Uani 1 1 d . A . 
C13 C 0.12558(6) 0.68774(15) 0.40731(10) 0.0122(2) Uani 1 1 d . . . 
C14 C 0.10888(7) 0.86787(16) 0.44127(12) 0.0176(3) Uani 1 1 d . A . 
H14A H 0.1510 0.9141 0.4932 0.026 Uiso 1 1 calc R . . 
H14B H 0.0670 0.8653 0.4782 0.026 Uiso 1 1 calc R . . 
H14C H 0.0979 0.9406 0.3744 0.026 Uiso 1 1 calc R . . 
B1 B 0.12114(7) 0.64948(18) 0.26655(12) 0.0132(3) Uani 1 1 d . A . 
H1B H 0.1052 0.7480 0.1994 0.016 Uiso 1 1 calc R . . 
B2 B 0.18900(8) 0.49452(18) 0.26009(12) 0.0136(3) Uani 1 1 d . . . 
H2B H 0.2177 0.4888 0.1877 0.016 Uiso 1 1 calc R A . 
B3 B 0.23504(7) 0.45155(17) 0.39963(12) 0.0136(3) Uani 1 1 d . A . 
H3B H 0.2940 0.4175 0.4192 0.016 Uiso 1 1 calc R . . 
B4 B 0.19529(7) 0.57949(18) 0.49193(12) 0.0135(3) Uani 1 1 d . A . 
H4B H 0.2276 0.6321 0.5720 0.016 Uiso 1 1 calc R . . 
B5 B 0.09701(8) 0.43133(18) 0.24677(12) 0.0138(3) Uani 1 1 d . A . 
H5B H 0.0645 0.3830 0.1656 0.017 Uiso 1 1 calc R . . 
B6 B 0.16750(8) 0.30752(18) 0.32951(12) 0.0147(3) Uani 1 1 d . A . 
H6B H 0.1814 0.1766 0.3028 0.018 Uiso 1 1 calc R . . 
B7 B 0.17207(8) 0.35998(18) 0.47416(12) 0.0146(3) Uani 1 1 d . . . 
H7B H 0.1892 0.2644 0.5429 0.018 Uiso 1 1 calc R A . 
B8 B 0.10355(7) 0.51496(18) 0.47960(12) 0.0136(3) Uani 1 1 d . A . 
H8B H 0.0752 0.5232 0.5523 0.016 Uiso 1 1 calc R . . 
B9 B 0.05756(7) 0.55866(18) 0.34002(12) 0.0135(3) Uani 1 1 d . A . 
H9B H -0.0011 0.5958 0.3206 0.016 Uiso 1 1 calc R . . 
B10 B 0.08613(8) 0.34686(18) 0.37971(12) 0.0140(3) Uani 1 1 d . A . 
H10B H 0.0465 0.2423 0.3864 0.017 Uiso 1 1 calc R . . 
 
loop_ 
 _atom_site_aniso_label 
 _atom_site_aniso_U_11 
 _atom_site_aniso_U_22 
 _atom_site_aniso_U_33 
 _atom_site_aniso_U_23 
 _atom_site_aniso_U_13 
 _atom_site_aniso_U_12 
S1 0.0126(5) 0.0222(4) 0.0146(5) -0.0023(3) -0.0007(3) -0.0019(4) 
S1A 0.0120(4) 0.0198(4) 0.0166(5) 0.0022(3) 0.0020(3) -0.0014(3) 
C1 0.0155(6) 0.0199(6) 0.0166(6) -0.0031(5) 0.0037(5) -0.0006(5) 
C2 0.0125(5) 0.0136(5) 0.0132(5) 0.0007(4) 0.0027(4) -0.0022(4) 
C3 0.0125(5) 0.0182(6) 0.0170(6) -0.0009(5) 0.0037(4) -0.0004(4) 
C5 0.0119(5) 0.0130(5) 0.0127(5) 0.0008(4) 0.0036(4) -0.0020(4) 
C6 0.0159(6) 0.0147(5) 0.0142(6) -0.0034(4) 0.0042(5) -0.0010(4) 
C7 0.0125(5) 0.0156(6) 0.0171(6) -0.0010(5) 0.0048(4) 0.0005(4) 
C8 0.0124(5) 0.0130(5) 0.0133(6) 0.0016(4) 0.0024(4) -0.0029(4) 
C9 0.0149(5) 0.0163(6) 0.0139(6) -0.0032(5) 0.0041(4) -0.0024(4) 
C10 0.0122(5) 0.0171(6) 0.0166(6) -0.0032(5) 0.0046(4) -0.0001(4) 
C11 0.0130(5) 0.0142(5) 0.0158(6) 0.0027(4) 0.0011(4) -0.0035(4) 
C12 0.0106(5) 0.0123(5) 0.0114(5) 0.0016(4) 0.0012(4) 0.0002(4) 
C13 0.0109(5) 0.0123(5) 0.0135(5) 0.0005(4) 0.0023(4) 0.0004(4) 
C14 0.0185(6) 0.0125(5) 0.0221(6) -0.0029(5) 0.0047(5) 0.0012(5) 
B1 0.0120(6) 0.0146(6) 0.0118(6) 0.0013(5) -0.0002(5) -0.0006(5) 
B2 0.0147(6) 0.0141(6) 0.0123(6) -0.0013(5) 0.0030(5) -0.0008(5) 
B3 0.0123(6) 0.0119(6) 0.0165(6) 0.0024(5) 0.0025(5) 0.0021(5) 
B4 0.0126(6) 0.0155(6) 0.0119(6) 0.0020(5) 0.0014(5) -0.0001(5) 
B5 0.0143(6) 0.0141(6) 0.0127(6) -0.0008(5) 0.0017(5) -0.0025(5) 
B6 0.0152(6) 0.0116(6) 0.0179(7) 0.0002(5) 0.0044(5) 0.0000(5) 
B7 0.0148(6) 0.0129(6) 0.0159(6) 0.0030(5) 0.0026(5) 0.0000(5) 
B8 0.0135(6) 0.0147(6) 0.0129(6) 0.0013(5) 0.0035(5) -0.0015(5) 
B9 0.0109(6) 0.0133(6) 0.0159(6) 0.0012(5) 0.0019(5) -0.0010(5) 
B10 0.0138(6) 0.0124(6) 0.0156(6) 0.0003(5) 0.0025(5) -0.0011(5) 
 
_geom_special_details 
; 
 All esds (except the esd in the dihedral angle between two l.s. planes) 
 are estimated using the full covariance matrix.  The cell esds are taken 
 into account individually in the estimation of esds in distances, angles 
 and torsion angles; correlations between esds in cell parameters are only 
 used when they are defined by crystal symmetry.  An approximate (isotropic) 
 treatment of cell esds is used for estimating esds involving l.s. planes. 
; 
 
loop_ 
 _geom_bond_atom_site_label_1 
 _geom_bond_atom_site_label_2 
 _geom_bond_distance 
 _geom_bond_site_symmetry_2 
 _geom_bond_publ_flag 
S1 C1 1.6576(18) . ? 
S1 C4 1.736(6) . ? 
C4 C3 1.353(5) . ? 
C4 H4 0.9500 . ? 
S1A C3 1.6996(17) . ? 
S1A C4A 1.716(9) . ? 
C4A C1 1.419(7) . ? 
C4A H4A 0.9500 . ? 
C1 C2 1.4008(18) . ? 
C1 H1 0.9500 . ? 
C2 C3 1.4061(17) . ? 
C2 C5 1.4776(17) . ? 
C3 H3 0.9500 . ? 
C5 C10 1.3998(17) . ? 
C5 C6 1.4003(17) . ? 
C6 C7 1.3868(17) . ? 
C6 H6 0.9500 . ? 
C7 C8 1.3964(17) . ? 
C7 H7 0.9500 . ? 
C8 C9 1.3925(17) . ? 
C8 C11 1.5099(17) . ? 
C9 C10 1.3945(17) . ? 
C9 H9 0.9500 . ? 
C10 H10 0.9500 . ? 
C11 C12 1.5339(16) . ? 
C11 H11A 0.9900 . ? 
C11 H11B 0.9900 . ? 
C12 C13 1.6836(17) . ? 
C12 B3 1.7074(18) . ? 
C12 B2 1.7136(19) . ? 
C12 B4 1.7241(18) . ? 
C12 B1 1.7259(18) . ? 
C13 C14 1.5169(17) . ? 
C13 B8 1.7056(18) . ? 
C13 B9 1.7068(18) . ? 
C13 B4 1.7218(18) . ? 
C13 B1 1.7233(19) . ? 
C14 H14A 0.9800 . ? 
C14 H14B 0.9800 . ? 
C14 H14C 0.9800 . ? 
B1 B5 1.768(2) . ? 
B1 B2 1.772(2) . ? 
B1 B9 1.774(2) . ? 
B1 H1B 1.1200 . ? 
B2 B6 1.773(2) . ? 
B2 B5 1.775(2) . ? 
B2 B3 1.779(2) . ? 
B2 H2B 1.1200 . ? 
B3 B4 1.774(2) . ? 
B3 B7 1.776(2) . ? 
B3 B6 1.784(2) . ? 
B3 H3B 1.1200 . ? 
B4 B7 1.773(2) . ? 
B4 B8 1.775(2) . ? 
B4 H4B 1.1200 . ? 
B5 B9 1.776(2) . ? 
B5 B6 1.784(2) . ? 
B5 B10 1.794(2) . ? 
B5 H5B 1.1200 . ? 
B6 B10 1.781(2) . ? 
B6 B7 1.791(2) . ? 
B6 H6B 1.1200 . ? 
B7 B8 1.779(2) . ? 
B7 B10 1.793(2) . ? 
B7 H7B 1.1200 . ? 
B8 B10 1.775(2) . ? 
B8 B9 1.781(2) . ? 
B8 H8B 1.1200 . ? 
B9 B10 1.777(2) . ? 
B9 H9B 1.1200 . ? 
B10 H10B 1.1200 . ? 
 
loop_ 
 _geom_angle_atom_site_label_1 
 _geom_angle_atom_site_label_2 
 _geom_angle_atom_site_label_3 
 _geom_angle 
 _geom_angle_site_symmetry_1 
 _geom_angle_site_symmetry_3 
 _geom_angle_publ_flag 
C1 S1 C4 91.40(17) . . ? 
C3 C4 S1 111.7(3) . . ? 
C3 C4 H4 124.2 . . ? 
S1 C4 H4 124.2 . . ? 
C3 S1A C4A 91.7(2) . . ? 
C1 C4A S1A 111.2(5) . . ? 
C1 C4A H4A 124.4 . . ? 
S1A C4A H4A 124.4 . . ? 
C2 C1 C4A 112.8(4) . . ? 
C2 C1 S1 113.27(11) . . ? 
C2 C1 H1 123.4 . . ? 
C4A C1 H1 123.9 . . ? 
S1 C1 H1 123.4 . . ? 
C1 C2 C3 110.84(11) . . ? 
C1 C2 C5 124.31(11) . . ? 
C3 C2 C5 124.84(11) . . ? 
C4 C3 C2 112.8(3) . . ? 
C2 C3 S1A 113.43(10) . . ? 
C4 C3 H3 123.6 . . ? 
C2 C3 H3 123.6 . . ? 
S1A C3 H3 123.0 . . ? 
C10 C5 C6 117.49(11) . . ? 
C10 C5 C2 121.29(11) . . ? 
C6 C5 C2 121.22(11) . . ? 
C7 C6 C5 121.24(11) . . ? 
C7 C6 H6 119.4 . . ? 
C5 C6 H6 119.4 . . ? 
C6 C7 C8 121.14(11) . . ? 
C6 C7 H7 119.4 . . ? 
C8 C7 H7 119.4 . . ? 
C9 C8 C7 117.99(11) . . ? 
C9 C8 C11 120.85(11) . . ? 
C7 C8 C11 121.05(11) . . ? 
C8 C9 C10 120.99(11) . . ? 
C8 C9 H9 119.5 . . ? 
C10 C9 H9 119.5 . . ? 
C9 C10 C5 121.13(11) . . ? 
C9 C10 H10 119.4 . . ? 
C5 C10 H10 119.4 . . ? 
C8 C11 C12 116.91(10) . . ? 
C8 C11 H11A 108.1 . . ? 
C12 C11 H11A 108.1 . . ? 
C8 C11 H11B 108.1 . . ? 
C12 C11 H11B 108.1 . . ? 
H11A C11 H11B 107.3 . . ? 
C11 C12 C13 118.98(10) . . ? 
C11 C12 B3 123.31(10) . . ? 
C13 C12 B3 110.10(9) . . ? 
C11 C12 B2 118.96(10) . . ? 
C13 C12 B2 109.96(9) . . ? 
B3 C12 B2 62.68(8) . . ? 
C11 C12 B4 120.98(10) . . ? 
C13 C12 B4 60.68(7) . . ? 
B3 C12 B4 62.24(8) . . ? 
B2 C12 B4 113.56(9) . . ? 
C11 C12 B1 114.19(10) . . ? 
C13 C12 B1 60.71(7) . . ? 
B3 C12 B1 113.47(9) . . ? 
B2 C12 B1 62.02(8) . . ? 
B4 C12 B1 112.81(9) . . ? 
C14 C13 C12 119.15(10) . . ? 
C14 C13 B8 120.67(10) . . ? 
C12 C13 B8 110.62(9) . . ? 
C14 C13 B9 120.21(10) . . ? 
C12 C13 B9 110.67(9) . . ? 
B8 C13 B9 62.91(8) . . ? 
C14 C13 B4 117.85(10) . . ? 
C12 C13 B4 60.82(7) . . ? 
B8 C13 B4 62.39(8) . . ? 
B9 C13 B4 114.06(10) . . ? 
C14 C13 B1 117.32(10) . . ? 
C12 C13 B1 60.86(7) . . ? 
B8 C13 B1 113.89(9) . . ? 
B9 C13 B1 62.30(8) . . ? 
B4 C13 B1 113.06(9) . . ? 
C13 C14 H14A 109.5 . . ? 
C13 C14 H14B 109.5 . . ? 
H14A C14 H14B 109.5 . . ? 
C13 C14 H14C 109.5 . . ? 
H14A C14 H14C 109.5 . . ? 
H14B C14 H14C 109.5 . . ? 
C13 B1 C12 58.43(7) . . ? 
C13 B1 B5 105.29(9) . . ? 
C12 B1 B5 105.62(9) . . ? 
C13 B1 B2 105.49(9) . . ? 
C12 B1 B2 58.65(7) . . ? 
B5 B1 B2 60.20(8) . . ? 
C13 B1 B9 58.40(8) . . ? 
C12 B1 B9 105.63(9) . . ? 
B5 B1 B9 60.18(8) . . ? 
B2 B1 B9 108.12(10) . . ? 
C13 B1 H1B 124.0 . . ? 
C12 B1 H1B 123.7 . . ? 
B5 B1 H1B 122.6 . . ? 
B2 B1 H1B 122.0 . . ? 
B9 B1 H1B 122.1 . . ? 
C12 B2 B1 59.33(7) . . ? 
C12 B2 B6 105.44(10) . . ? 
B1 B2 B6 107.98(10) . . ? 
C12 B2 B5 105.83(10) . . ? 
B1 B2 B5 59.80(8) . . ? 
B6 B2 B5 60.36(8) . . ? 
C12 B2 B3 58.49(7) . . ? 
B1 B2 B3 107.87(10) . . ? 
B6 B2 B3 60.28(8) . . ? 
B5 B2 B3 108.55(10) . . ? 
C12 B2 H2B 124.1 . . ? 
B1 B2 H2B 121.6 . . ? 
B6 B2 H2B 122.1 . . ? 
B5 B2 H2B 121.8 . . ? 
B3 B2 H2B 121.5 . . ? 
C12 B3 B4 59.34(8) . . ? 
C12 B3 B7 105.91(9) . . ? 
B4 B3 B7 59.92(8) . . ? 
C12 B3 B2 58.83(8) . . ? 
B4 B3 B2 108.08(10) . . ? 
B7 B3 B2 108.30(10) . . ? 
C12 B3 B6 105.24(9) . . ? 
B4 B3 B6 108.02(10) . . ? 
B7 B3 B6 60.42(8) . . ? 
B2 B3 B6 59.69(8) . . ? 
C12 B3 H3B 124.0 . . ? 
B4 B3 H3B 121.5 . . ? 
B7 B3 H3B 121.8 . . ? 
B2 B3 H3B 121.6 . . ? 
B6 B3 H3B 122.3 . . ? 
C13 B4 C12 58.49(7) . . ? 
C13 B4 B7 105.18(9) . . ? 
C12 B4 B7 105.35(10) . . ? 
C13 B4 B3 105.34(10) . . ? 
C12 B4 B3 58.42(8) . . ? 
B7 B4 B3 60.11(8) . . ? 
C13 B4 B8 58.36(7) . . ? 
C12 B4 B8 105.57(9) . . ? 
B7 B4 B8 60.18(8) . . ? 
B3 B4 B8 108.01(10) . . ? 
C13 B4 H4B 124.0 . . ? 
C12 B4 H4B 123.8 . . ? 
B7 B4 H4B 122.7 . . ? 
B3 B4 H4B 122.2 . . ? 
B8 B4 H4B 122.1 . . ? 
B1 B5 B2 60.00(8) . . ? 
B1 B5 B9 60.08(8) . . ? 
B2 B5 B9 107.88(10) . . ? 
B1 B5 B6 107.67(10) . . ? 
B2 B5 B6 59.76(8) . . ? 
B9 B5 B6 107.50(10) . . ? 
B1 B5 B10 107.66(10) . . ? 
B2 B5 B10 107.51(10) . . ? 
B9 B5 B10 59.70(8) . . ? 
B6 B5 B10 59.71(8) . . ? 
B1 B5 H5B 121.8 . . ? 
B2 B5 H5B 121.9 . . ? 
B9 B5 H5B 121.9 . . ? 
B6 B5 H5B 122.1 . . ? 
B10 B5 H5B 122.1 . . ? 
B2 B6 B10 108.18(10) . . ? 
B2 B6 B3 60.03(8) . . ? 
B10 B6 B3 107.83(10) . . ? 
B2 B6 B5 59.88(8) . . ? 
B10 B6 B5 60.43(8) . . ? 
B3 B6 B5 107.96(10) . . ? 
B2 B6 B7 107.89(10) . . ? 
B10 B6 B7 60.24(8) . . ? 
B3 B6 B7 59.57(8) . . ? 
B5 B6 B7 108.50(10) . . ? 
B2 B6 H6B 121.8 . . ? 
B10 B6 H6B 121.5 . . ? 
B3 B6 H6B 122.0 . . ? 
B5 B6 H6B 121.4 . . ? 
B7 B6 H6B 121.7 . . ? 
B4 B7 B3 59.97(8) . . ? 
B4 B7 B8 59.98(8) . . ? 
B3 B7 B8 107.74(10) . . ? 
B4 B7 B6 107.73(10) . . ? 
B3 B7 B6 60.00(8) . . ? 
B8 B7 B6 107.23(10) . . ? 
B4 B7 B10 107.64(9) . . ? 
B3 B7 B10 107.67(10) . . ? 
B8 B7 B10 59.61(8) . . ? 
B6 B7 B10 59.60(8) . . ? 
B4 B7 H7B 121.8 . . ? 
B3 B7 H7B 121.7 . . ? 
B8 B7 H7B 122.1 . . ? 
B6 B7 H7B 122.1 . . ? 
B10 B7 H7B 122.1 . . ? 
C13 B8 B4 59.25(7) . . ? 
C13 B8 B10 105.31(10) . . ? 
B4 B8 B10 108.31(10) . . ? 
C13 B8 B7 105.61(9) . . ? 
B4 B8 B7 59.84(8) . . ? 
B10 B8 B7 60.59(8) . . ? 
C13 B8 B9 58.58(8) . . ? 
B4 B8 B9 107.99(10) . . ? 
B10 B8 B9 59.98(8) . . ? 
B7 B8 B9 108.38(10) . . ? 
C13 B8 H8B 124.2 . . ? 
B4 B8 H8B 121.4 . . ? 
B10 B8 H8B 122.0 . . ? 
B7 B8 H8B 121.9 . . ? 
B9 B8 H8B 121.6 . . ? 
C13 B9 B1 59.31(7) . . ? 
C13 B9 B5 105.64(9) . . ? 
B1 B9 B5 59.74(8) . . ? 
C13 B9 B10 105.17(9) . . ? 
B1 B9 B10 108.15(10) . . ? 
B5 B9 B10 60.66(8) . . ? 
C13 B9 B8 58.51(7) . . ? 
B1 B9 B8 107.88(9) . . ? 
B5 B9 B8 108.38(10) . . ? 
B10 B9 B8 59.86(8) . . ? 
C13 B9 H9B 124.2 . . ? 
B1 B9 H9B 121.5 . . ? 
B5 B9 H9B 121.9 . . ? 
B10 B9 H9B 122.1 . . ? 
B8 B9 H9B 121.7 . . ? 
B8 B10 B9 60.16(8) . . ? 
B8 B10 B6 107.83(10) . . ? 
B9 B10 B6 107.57(10) . . ? 
B8 B10 B7 59.80(8) . . ? 
B9 B10 B7 107.90(9) . . ? 
B6 B10 B7 60.16(8) . . ? 
B8 B10 B5 107.81(10) . . ? 
B9 B10 B5 59.64(8) . . ? 
B6 B10 B5 59.86(8) . . ? 
B7 B10 B5 107.98(10) . . ? 
B8 B10 H10B 121.8 . . ? 
B9 B10 H10B 121.9 . . ? 
B6 B10 H10B 121.9 . . ? 
B7 B10 H10B 121.7 . . ? 
B5 B10 H10B 121.9 . . ? 
 
loop_ 
 _geom_torsion_atom_site_label_1 
 _geom_torsion_atom_site_label_2 
 _geom_torsion_atom_site_label_3 
 _geom_torsion_atom_site_label_4 
 _geom_torsion 
 _geom_torsion_site_symmetry_1 
 _geom_torsion_site_symmetry_2 
 _geom_torsion_site_symmetry_3 
 _geom_torsion_site_symmetry_4 
 _geom_torsion_publ_flag 
C1 S1 C4 C3 1.5(3) . . . . ? 
C3 S1A C4A C1 -0.6(5) . . . . ? 
S1A C4A C1 C2 0.7(6) . . . . ? 
C4 S1 C1 C2 -1.0(2) . . . . ? 
C4A C1 C2 C3 -0.4(4) . . . . ? 
S1 C1 C2 C3 0.31(15) . . . . ? 
C4A C1 C2 C5 178.7(4) . . . . ? 
S1 C1 C2 C5 179.42(11) . . . . ? 
S1 C4 C3 C2 -1.6(4) . . . . ? 
C1 C2 C3 C4 0.9(3) . . . . ? 
C5 C2 C3 C4 -178.2(3) . . . . ? 
C1 C2 C3 S1A -0.06(15) . . . . ? 
C5 C2 C3 S1A -179.16(10) . . . . ? 
C4A S1A C3 C4 -53(14) . . . . ? 
C4A S1A C3 C2 0.4(3) . . . . ? 
C1 C2 C5 C10 -176.20(12) . . . . ? 
C3 C2 C5 C10 2.79(19) . . . . ? 
C1 C2 C5 C6 3.92(19) . . . . ? 
C3 C2 C5 C6 -177.10(12) . . . . ? 
C10 C5 C6 C7 1.31(18) . . . . ? 
C2 C5 C6 C7 -178.80(12) . . . . ? 
C5 C6 C7 C8 -0.11(19) . . . . ? 
C6 C7 C8 C9 -1.30(18) . . . . ? 
C6 C7 C8 C11 -177.49(11) . . . . ? 
C7 C8 C9 C10 1.48(18) . . . . ? 
C11 C8 C9 C10 177.68(11) . . . . ? 
C8 C9 C10 C5 -0.27(19) . . . . ? 
C6 C5 C10 C9 -1.13(18) . . . . ? 
C2 C5 C10 C9 178.98(12) . . . . ? 
C9 C8 C11 C12 87.52(15) . . . . ? 
C7 C8 C11 C12 -96.40(14) . . . . ? 
C8 C11 C12 C13 108.33(12) . . . . ? 
C8 C11 C12 B3 -38.19(16) . . . . ? 
C8 C11 C12 B2 -112.88(12) . . . . ? 
C8 C11 C12 B4 37.01(16) . . . . ? 
C8 C11 C12 B1 176.96(10) . . . . ? 
C11 C12 C13 C14 -3.81(16) . . . . ? 
B3 C12 C13 C14 146.78(11) . . . . ? 
B2 C12 C13 C14 -145.99(11) . . . . ? 
B4 C12 C13 C14 107.53(12) . . . . ? 
B1 C12 C13 C14 -106.90(12) . . . . ? 
C11 C12 C13 B8 -150.32(10) . . . . ? 
B3 C12 C13 B8 0.28(13) . . . . ? 
B2 C12 C13 B8 67.50(12) . . . . ? 
B4 C12 C13 B8 -38.98(9) . . . . ? 
B1 C12 C13 B8 106.59(10) . . . . ? 
C11 C12 C13 B9 141.90(10) . . . . ? 
B3 C12 C13 B9 -67.51(12) . . . . ? 
B2 C12 C13 B9 -0.28(12) . . . . ? 
B4 C12 C13 B9 -106.76(11) . . . . ? 
B1 C12 C13 B9 38.81(9) . . . . ? 
C11 C12 C13 B4 -111.34(12) . . . . ? 
B3 C12 C13 B4 39.25(9) . . . . ? 
B2 C12 C13 B4 106.48(10) . . . . ? 
B1 C12 C13 B4 145.57(10) . . . . ? 
C11 C12 C13 B1 103.09(11) . . . . ? 
B3 C12 C13 B1 -106.32(10) . . . . ? 
B2 C12 C13 B1 -39.09(9) . . . . ? 
B4 C12 C13 B1 -145.57(10) . . . . ? 
C14 C13 B1 C12 109.86(11) . . . . ? 
B8 C13 B1 C12 -101.19(10) . . . . ? 
B9 C13 B1 C12 -138.52(10) . . . . ? 
B4 C13 B1 C12 -32.44(9) . . . . ? 
C14 C13 B1 B5 -150.96(10) . . . . ? 
C12 C13 B1 B5 99.19(10) . . . . ? 
B8 C13 B1 B5 -2.01(12) . . . . ? 
B9 C13 B1 B5 -39.34(9) . . . . ? 
B4 C13 B1 B5 66.74(12) . . . . ? 
C14 C13 B1 B2 146.35(10) . . . . ? 
C12 C13 B1 B2 36.50(8) . . . . ? 
B8 C13 B1 B2 -64.70(12) . . . . ? 
B9 C13 B1 B2 -102.03(10) . . . . ? 
B4 C13 B1 B2 4.05(13) . . . . ? 
C14 C13 B1 B9 -111.62(12) . . . . ? 
C12 C13 B1 B9 138.52(10) . . . . ? 
B8 C13 B1 B9 37.33(9) . . . . ? 
B4 C13 B1 B9 106.08(11) . . . . ? 
C11 C12 B1 C13 -110.91(11) . . . . ? 
B3 C12 B1 C13 100.72(10) . . . . ? 
B2 C12 B1 C13 137.85(10) . . . . ? 
B4 C12 B1 C13 32.33(9) . . . . ? 
C11 C12 B1 B5 150.49(10) . . . . ? 
C13 C12 B1 B5 -98.60(10) . . . . ? 
B3 C12 B1 B5 2.12(13) . . . . ? 
B2 C12 B1 B5 39.24(9) . . . . ? 
B4 C12 B1 B5 -66.28(12) . . . . ? 
C11 C12 B1 B2 111.24(11) . . . . ? 
C13 C12 B1 B2 -137.85(10) . . . . ? 
B3 C12 B1 B2 -37.12(10) . . . . ? 
B4 C12 B1 B2 -105.52(11) . . . . ? 
C11 C12 B1 B9 -146.77(10) . . . . ? 
C13 C12 B1 B9 -35.86(9) . . . . ? 
B3 C12 B1 B9 64.87(12) . . . . ? 
B2 C12 B1 B9 101.99(10) . . . . ? 
B4 C12 B1 B9 -3.53(13) . . . . ? 
C11 C12 B2 B1 -103.67(11) . . . . ? 
C13 C12 B2 B1 38.51(9) . . . . ? 
B3 C12 B2 B1 141.46(10) . . . . ? 
B4 C12 B2 B1 104.31(10) . . . . ? 
C11 C12 B2 B6 154.29(10) . . . . ? 
C13 C12 B2 B6 -63.52(11) . . . . ? 
B3 C12 B2 B6 39.42(9) . . . . ? 
B4 C12 B2 B6 2.27(13) . . . . ? 
B1 C12 B2 B6 -102.04(10) . . . . ? 
C11 C12 B2 B5 -142.77(10) . . . . ? 
C13 C12 B2 B5 -0.58(12) . . . . ? 
B3 C12 B2 B5 102.36(10) . . . . ? 
B4 C12 B2 B5 65.21(12) . . . . ? 
B1 C12 B2 B5 -39.10(9) . . . . ? 
C11 C12 B2 B3 114.87(12) . . . . ? 
C13 C12 B2 B3 -102.94(10) . . . . ? 
B4 C12 B2 B3 -37.15(9) . . . . ? 
B1 C12 B2 B3 -141.46(10) . . . . ? 
C13 B1 B2 C12 -36.40(8) . . . . ? 
B5 B1 B2 C12 -135.41(10) . . . . ? 
B9 B1 B2 C12 -97.62(10) . . . . ? 
C13 B1 B2 B6 61.24(12) . . . . ? 
C12 B1 B2 B6 97.64(10) . . . . ? 
B5 B1 B2 B6 -37.77(9) . . . . ? 
B9 B1 B2 B6 0.02(13) . . . . ? 
C13 B1 B2 B5 99.01(10) . . . . ? 
C12 B1 B2 B5 135.41(10) . . . . ? 
B9 B1 B2 B5 37.79(9) . . . . ? 
C13 B1 B2 B3 -2.47(12) . . . . ? 
C12 B1 B2 B3 33.93(9) . . . . ? 
B5 B1 B2 B3 -101.48(10) . . . . ? 
B9 B1 B2 B3 -63.69(12) . . . . ? 
C11 C12 B3 B4 110.50(12) . . . . ? 
C13 C12 B3 B4 -38.57(9) . . . . ? 
B2 C12 B3 B4 -141.28(10) . . . . ? 
B1 C12 B3 B4 -104.42(10) . . . . ? 
C11 C12 B3 B7 149.71(11) . . . . ? 
C13 C12 B3 B7 0.64(12) . . . . ? 
B2 C12 B3 B7 -102.07(10) . . . . ? 
B4 C12 B3 B7 39.21(9) . . . . ? 
B1 C12 B3 B7 -65.21(12) . . . . ? 
C11 C12 B3 B2 -108.22(12) . . . . ? 
C13 C12 B3 B2 102.71(10) . . . . ? 
B4 C12 B3 B2 141.28(10) . . . . ? 
B1 C12 B3 B2 36.86(9) . . . . ? 
C11 C12 B3 B6 -147.31(11) . . . . ? 
C13 C12 B3 B6 63.62(12) . . . . ? 
B2 C12 B3 B6 -39.09(9) . . . . ? 
B4 C12 B3 B6 102.19(10) . . . . ? 
B1 C12 B3 B6 -2.23(13) . . . . ? 
B1 B2 B3 C12 -34.27(9) . . . . ? 
B6 B2 B3 C12 -135.19(10) . . . . ? 
B5 B2 B3 C12 -97.57(10) . . . . ? 
C12 B2 B3 B4 34.47(9) . . . . ? 
B1 B2 B3 B4 0.20(13) . . . . ? 
B6 B2 B3 B4 -100.72(10) . . . . ? 
B5 B2 B3 B4 -63.10(12) . . . . ? 
C12 B2 B3 B7 97.89(10) . . . . ? 
B1 B2 B3 B7 63.62(12) . . . . ? 
B6 B2 B3 B7 -37.30(9) . . . . ? 
B5 B2 B3 B7 0.32(13) . . . . ? 
C12 B2 B3 B6 135.19(10) . . . . ? 
B1 B2 B3 B6 100.92(10) . . . . ? 
B5 B2 B3 B6 37.62(9) . . . . ? 
C14 C13 B4 C12 -109.63(12) . . . . ? 
B8 C13 B4 C12 138.36(10) . . . . ? 
B9 C13 B4 C12 101.16(10) . . . . ? 
B1 C13 B4 C12 32.46(9) . . . . ? 
C14 C13 B4 B7 151.44(11) . . . . ? 
C12 C13 B4 B7 -98.93(10) . . . . ? 
B8 C13 B4 B7 39.43(9) . . . . ? 
B9 C13 B4 B7 2.22(13) . . . . ? 
B1 C13 B4 B7 -66.48(12) . . . . ? 
C14 C13 B4 B3 -146.01(11) . . . . ? 
C12 C13 B4 B3 -36.38(9) . . . . ? 
B8 C13 B4 B3 101.98(10) . . . . ? 
B9 C13 B4 B3 64.77(12) . . . . ? 
B1 C13 B4 B3 -3.92(13) . . . . ? 
C14 C13 B4 B8 112.01(12) . . . . ? 
C12 C13 B4 B8 -138.36(10) . . . . ? 
B9 C13 B4 B8 -37.21(10) . . . . ? 
B1 C13 B4 B8 -105.91(11) . . . . ? 
C11 C12 B4 C13 108.11(12) . . . . ? 
B3 C12 B4 C13 -137.82(10) . . . . ? 
B2 C12 B4 C13 -100.50(10) . . . . ? 
B1 C12 B4 C13 -32.34(9) . . . . ? 
C11 C12 B4 B7 -153.24(10) . . . . ? 
C13 C12 B4 B7 98.65(10) . . . . ? 
B3 C12 B4 B7 -39.17(9) . . . . ? 
B2 C12 B4 B7 -1.85(12) . . . . ? 
B1 C12 B4 B7 66.31(11) . . . . ? 
C11 C12 B4 B3 -114.07(12) . . . . ? 
C13 C12 B4 B3 137.82(10) . . . . ? 
B2 C12 B4 B3 37.32(10) . . . . ? 
B1 C12 B4 B3 105.48(10) . . . . ? 
C11 C12 B4 B8 144.07(11) . . . . ? 
C13 C12 B4 B8 35.96(9) . . . . ? 
B3 C12 B4 B8 -101.86(10) . . . . ? 
B2 C12 B4 B8 -64.54(12) . . . . ? 
B1 C12 B4 B8 3.62(13) . . . . ? 
C12 B3 B4 C13 36.42(8) . . . . ? 
B7 B3 B4 C13 -98.95(10) . . . . ? 
B2 B3 B4 C13 2.15(12) . . . . ? 
B6 B3 B4 C13 -60.97(12) . . . . ? 
B7 B3 B4 C12 -135.37(10) . . . . ? 
B2 B3 B4 C12 -34.26(9) . . . . ? 
B6 B3 B4 C12 -97.39(10) . . . . ? 
C12 B3 B4 B7 135.37(10) . . . . ? 
B2 B3 B4 B7 101.10(10) . . . . ? 
B6 B3 B4 B7 37.98(9) . . . . ? 
C12 B3 B4 B8 97.55(10) . . . . ? 
B7 B3 B4 B8 -37.82(9) . . . . ? 
B2 B3 B4 B8 63.29(12) . . . . ? 
B6 B3 B4 B8 0.16(13) . . . . ? 
C13 B1 B5 B2 -99.36(10) . . . . ? 
C12 B1 B5 B2 -38.50(9) . . . . ? 
B9 B1 B5 B2 -137.84(10) . . . . ? 
C13 B1 B5 B9 38.48(9) . . . . ? 
C12 B1 B5 B9 99.33(10) . . . . ? 
B2 B1 B5 B9 137.84(10) . . . . ? 
C13 B1 B5 B6 -61.94(11) . . . . ? 
C12 B1 B5 B6 -1.08(12) . . . . ? 
B2 B1 B5 B6 37.42(9) . . . . ? 
B9 B1 B5 B6 -100.42(10) . . . . ? 
C13 B1 B5 B10 1.05(12) . . . . ? 
C12 B1 B5 B10 61.90(11) . . . . ? 
B2 B1 B5 B10 100.41(10) . . . . ? 
B9 B1 B5 B10 -37.43(9) . . . . ? 
C12 B2 B5 B1 38.88(9) . . . . ? 
B6 B2 B5 B1 137.92(10) . . . . ? 
B3 B2 B5 B1 100.33(10) . . . . ? 
C12 B2 B5 B9 1.20(13) . . . . ? 
B1 B2 B5 B9 -37.68(9) . . . . ? 
B6 B2 B5 B9 100.23(11) . . . . ? 
B3 B2 B5 B9 62.65(12) . . . . ? 
C12 B2 B5 B6 -99.04(10) . . . . ? 
B1 B2 B5 B6 -137.92(10) . . . . ? 
B3 B2 B5 B6 -37.59(9) . . . . ? 
C12 B2 B5 B10 -61.80(12) . . . . ? 
B1 B2 B5 B10 -100.68(10) . . . . ? 
B6 B2 B5 B10 37.24(9) . . . . ? 
B3 B2 B5 B10 -0.35(13) . . . . ? 
C12 B2 B6 B10 61.97(12) . . . . ? 
B1 B2 B6 B10 -0.21(13) . . . . ? 
B5 B2 B6 B10 -37.72(9) . . . . ? 
B3 B2 B6 B10 100.53(11) . . . . ? 
C12 B2 B6 B3 -38.56(9) . . . . ? 
B1 B2 B6 B3 -100.74(10) . . . . ? 
B5 B2 B6 B3 -138.25(10) . . . . ? 
C12 B2 B6 B5 99.69(10) . . . . ? 
B1 B2 B6 B5 37.52(9) . . . . ? 
B3 B2 B6 B5 138.25(10) . . . . ? 
C12 B2 B6 B7 -1.73(12) . . . . ? 
B1 B2 B6 B7 -63.91(12) . . . . ? 
B5 B2 B6 B7 -101.43(10) . . . . ? 
B3 B2 B6 B7 36.82(9) . . . . ? 
C12 B3 B6 B2 38.68(9) . . . . ? 
B4 B3 B6 B2 100.83(10) . . . . ? 
B7 B3 B6 B2 138.59(10) . . . . ? 
C12 B3 B6 B10 -62.43(12) . . . . ? 
B4 B3 B6 B10 -0.28(13) . . . . ? 
B7 B3 B6 B10 37.47(9) . . . . ? 
B2 B3 B6 B10 -101.11(10) . . . . ? 
C12 B3 B6 B5 1.42(12) . . . . ? 
B4 B3 B6 B5 63.57(12) . . . . ? 
B7 B3 B6 B5 101.33(10) . . . . ? 
B2 B3 B6 B5 -37.26(9) . . . . ? 
C12 B3 B6 B7 -99.90(10) . . . . ? 
B4 B3 B6 B7 -37.75(9) . . . . ? 
B2 B3 B6 B7 -138.59(10) . . . . ? 
B1 B5 B6 B2 -37.53(9) . . . . ? 
B9 B5 B6 B2 -100.88(10) . . . . ? 
B10 B5 B6 B2 -138.06(10) . . . . ? 
B1 B5 B6 B10 100.53(10) . . . . ? 
B2 B5 B6 B10 138.06(10) . . . . ? 
B9 B5 B6 B10 37.17(9) . . . . ? 
B1 B5 B6 B3 -0.21(13) . . . . ? 
B2 B5 B6 B3 37.32(9) . . . . ? 
B9 B5 B6 B3 -63.56(12) . . . . ? 
B10 B5 B6 B3 -100.74(10) . . . . ? 
B1 B5 B6 B7 62.86(12) . . . . ? 
B2 B5 B6 B7 100.39(10) . . . . ? 
B9 B5 B6 B7 -0.49(13) . . . . ? 
B10 B5 B6 B7 -37.67(9) . . . . ? 
C13 B4 B7 B3 99.22(10) . . . . ? 
C12 B4 B7 B3 38.36(9) . . . . ? 
B8 B4 B7 B3 137.77(10) . . . . ? 
C13 B4 B7 B8 -38.55(9) . . . . ? 
C12 B4 B7 B8 -99.41(10) . . . . ? 
B3 B4 B7 B8 -137.77(10) . . . . ? 
C13 B4 B7 B6 61.50(12) . . . . ? 
C12 B4 B7 B6 0.64(12) . . . . ? 
B3 B4 B7 B6 -37.72(9) . . . . ? 
B8 B4 B7 B6 100.05(10) . . . . ? 
C13 B4 B7 B10 -1.38(12) . . . . ? 
C12 B4 B7 B10 -62.24(11) . . . . ? 
B3 B4 B7 B10 -100.60(11) . . . . ? 
B8 B4 B7 B10 37.17(9) . . . . ? 
C12 B3 B7 B4 -38.93(9) . . . . ? 
B2 B3 B7 B4 -100.73(10) . . . . ? 
B6 B3 B7 B4 -137.71(10) . . . . ? 
C12 B3 B7 B8 -1.27(13) . . . . ? 
B4 B3 B7 B8 37.66(9) . . . . ? 
B2 B3 B7 B8 -63.07(12) . . . . ? 
B6 B3 B7 B8 -100.05(10) . . . . ? 
C12 B3 B7 B6 98.77(10) . . . . ? 
B4 B3 B7 B6 137.71(10) . . . . ? 
B2 B3 B7 B6 36.98(9) . . . . ? 
C12 B3 B7 B10 61.63(12) . . . . ? 
B4 B3 B7 B10 100.56(10) . . . . ? 
B2 B3 B7 B10 -0.17(13) . . . . ? 
B6 B3 B7 B10 -37.15(9) . . . . ? 
B2 B6 B7 B4 0.68(13) . . . . ? 
B10 B6 B7 B4 -100.45(10) . . . . ? 
B3 B6 B7 B4 37.71(9) . . . . ? 
B5 B6 B7 B4 -62.69(12) . . . . ? 
B2 B6 B7 B3 -37.02(9) . . . . ? 
B10 B6 B7 B3 -138.16(10) . . . . ? 
B5 B6 B7 B3 -100.40(10) . . . . ? 
B2 B6 B7 B8 63.89(12) . . . . ? 
B10 B6 B7 B8 -37.24(9) . . . . ? 
B3 B6 B7 B8 100.91(10) . . . . ? 
B5 B6 B7 B8 0.51(13) . . . . ? 
B2 B6 B7 B10 101.13(10) . . . . ? 
B3 B6 B7 B10 138.16(10) . . . . ? 
B5 B6 B7 B10 37.75(9) . . . . ? 
C14 C13 B8 B4 -107.62(12) . . . . ? 
C12 C13 B8 B4 38.30(9) . . . . ? 
B9 C13 B8 B4 141.67(10) . . . . ? 
B1 C13 B8 B4 104.58(10) . . . . ? 
C14 C13 B8 B10 149.90(11) . . . . ? 
C12 C13 B8 B10 -64.18(11) . . . . ? 
B9 C13 B8 B10 39.18(9) . . . . ? 
B4 C13 B8 B10 -102.48(10) . . . . ? 
B1 C13 B8 B10 2.09(13) . . . . ? 
C14 C13 B8 B7 -146.98(11) . . . . ? 
C12 C13 B8 B7 -1.06(12) . . . . ? 
B9 C13 B8 B7 102.30(10) . . . . ? 
B4 C13 B8 B7 -39.37(9) . . . . ? 
B1 C13 B8 B7 65.21(12) . . . . ? 
C14 C13 B8 B9 110.72(12) . . . . ? 
C12 C13 B8 B9 -103.37(10) . . . . ? 
B4 C13 B8 B9 -141.67(10) . . . . ? 
B1 C13 B8 B9 -37.09(9) . . . . ? 
C12 B4 B8 C13 -36.02(8) . . . . ? 
B7 B4 B8 C13 -135.05(10) . . . . ? 
B3 B4 B8 C13 -97.26(10) . . . . ? 
C13 B4 B8 B10 97.28(10) . . . . ? 
C12 B4 B8 B10 61.26(12) . . . . ? 
B7 B4 B8 B10 -37.77(9) . . . . ? 
B3 B4 B8 B10 0.02(13) . . . . ? 
C13 B4 B8 B7 135.05(10) . . . . ? 
C12 B4 B8 B7 99.03(10) . . . . ? 
B3 B4 B8 B7 37.79(9) . . . . ? 
C13 B4 B8 B9 33.81(9) . . . . ? 
C12 B4 B8 B9 -2.21(12) . . . . ? 
B7 B4 B8 B9 -101.24(11) . . . . ? 
B3 B4 B8 B9 -63.45(12) . . . . ? 
B4 B7 B8 C13 39.08(9) . . . . ? 
B3 B7 B8 C13 1.43(13) . . . . ? 
B6 B7 B8 C13 -61.81(11) . . . . ? 
B10 B7 B8 C13 -99.05(10) . . . . ? 
B3 B7 B8 B4 -37.66(9) . . . . ? 
B6 B7 B8 B4 -100.89(10) . . . . ? 
B10 B7 B8 B4 -138.13(10) . . . . ? 
B4 B7 B8 B10 138.13(10) . . . . ? 
B3 B7 B8 B10 100.47(11) . . . . ? 
B6 B7 B8 B10 37.24(9) . . . . ? 
B4 B7 B8 B9 100.56(10) . . . . ? 
B3 B7 B8 B9 62.90(12) . . . . ? 
B6 B7 B8 B9 -0.33(12) . . . . ? 
B10 B7 B8 B9 -37.57(9) . . . . ? 
C14 C13 B9 B1 107.10(12) . . . . ? 
C12 C13 B9 B1 -38.19(9) . . . . ? 
B8 C13 B9 B1 -141.48(10) . . . . ? 
B4 C13 B9 B1 -104.48(10) . . . . ? 
C14 C13 B9 B5 146.31(11) . . . . ? 
C12 C13 B9 B5 1.02(12) . . . . ? 
B8 C13 B9 B5 -102.27(10) . . . . ? 
B4 C13 B9 B5 -65.27(12) . . . . ? 
B1 C13 B9 B5 39.21(9) . . . . ? 
C14 C13 B9 B10 -150.52(11) . . . . ? 
C12 C13 B9 B10 64.19(11) . . . . ? 
B8 C13 B9 B10 -39.10(9) . . . . ? 
B4 C13 B9 B10 -2.10(13) . . . . ? 
B1 C13 B9 B10 102.38(10) . . . . ? 
C14 C13 B9 B8 -111.42(12) . . . . ? 
C12 C13 B9 B8 103.29(10) . . . . ? 
B4 C13 B9 B8 37.00(10) . . . . ? 
B1 C13 B9 B8 141.48(10) . . . . ? 
C12 B1 B9 C13 35.87(8) . . . . ? 
B5 B1 B9 C13 135.19(10) . . . . ? 
B2 B1 B9 C13 97.39(10) . . . . ? 
C13 B1 B9 B5 -135.19(10) . . . . ? 
C12 B1 B9 B5 -99.32(10) . . . . ? 
B2 B1 B9 B5 -37.80(9) . . . . ? 
C13 B1 B9 B10 -97.22(10) . . . . ? 
C12 B1 B9 B10 -61.34(12) . . . . ? 
B5 B1 B9 B10 37.97(9) . . . . ? 
B2 B1 B9 B10 0.18(13) . . . . ? 
C13 B1 B9 B8 -33.92(9) . . . . ? 
C12 B1 B9 B8 1.95(12) . . . . ? 
B5 B1 B9 B8 101.27(10) . . . . ? 
B2 B1 B9 B8 63.47(12) . . . . ? 
B1 B5 B9 C13 -39.00(9) . . . . ? 
B2 B5 B9 C13 -1.35(13) . . . . ? 
B6 B5 B9 C13 61.70(12) . . . . ? 
B10 B5 B9 C13 98.87(10) . . . . ? 
B2 B5 B9 B1 37.65(9) . . . . ? 
B6 B5 B9 B1 100.70(10) . . . . ? 
B10 B5 B9 B1 137.88(10) . . . . ? 
B1 B5 B9 B10 -137.88(10) . . . . ? 
B2 B5 B9 B10 -100.23(10) . . . . ? 
B6 B5 B9 B10 -37.18(9) . . . . ? 
B1 B5 B9 B8 -100.41(10) . . . . ? 
B2 B5 B9 B8 -62.76(12) . . . . ? 
B6 B5 B9 B8 0.29(13) . . . . ? 
B10 B5 B9 B8 37.46(9) . . . . ? 
B4 B8 B9 C13 -34.09(9) . . . . ? 
B10 B8 B9 C13 -135.26(10) . . . . ? 
B7 B8 B9 C13 -97.42(10) . . . . ? 
C13 B8 B9 B1 34.24(9) . . . . ? 
B4 B8 B9 B1 0.16(13) . . . . ? 
B10 B8 B9 B1 -101.02(10) . . . . ? 
B7 B8 B9 B1 -63.18(12) . . . . ? 
C13 B8 B9 B5 97.45(10) . . . . ? 
B4 B8 B9 B5 63.37(12) . . . . ? 
B10 B8 B9 B5 -37.81(9) . . . . ? 
B7 B8 B9 B5 0.03(13) . . . . ? 
C13 B8 B9 B10 135.26(10) . . . . ? 
B4 B8 B9 B10 101.18(10) . . . . ? 
B7 B8 B9 B10 37.84(9) . . . . ? 
C13 B8 B10 B9 -38.52(9) . . . . ? 
B4 B8 B10 B9 -100.63(10) . . . . ? 
B7 B8 B10 B9 -138.07(10) . . . . ? 
C13 B8 B10 B6 61.92(12) . . . . ? 
B4 B8 B10 B6 -0.20(13) . . . . ? 
B7 B8 B10 B6 -37.63(9) . . . . ? 
B9 B8 B10 B6 100.43(10) . . . . ? 
C13 B8 B10 B7 99.55(10) . . . . ? 
B4 B8 B10 B7 37.44(9) . . . . ? 
B9 B8 B10 B7 138.07(10) . . . . ? 
C13 B8 B10 B5 -1.30(12) . . . . ? 
B4 B8 B10 B5 -63.41(12) . . . . ? 
B7 B8 B10 B5 -100.85(10) . . . . ? 
B9 B8 B10 B5 37.22(9) . . . . ? 
C13 B9 B10 B8 38.45(9) . . . . ? 
B1 B9 B10 B8 100.57(10) . . . . ? 
B5 B9 B10 B8 138.13(10) . . . . ? 
C13 B9 B10 B6 -62.42(12) . . . . ? 
B1 B9 B10 B6 -0.30(13) . . . . ? 
B5 B9 B10 B6 37.26(9) . . . . ? 
B8 B9 B10 B6 -100.87(10) . . . . ? 
C13 B9 B10 B7 1.08(12) . . . . ? 
B1 B9 B10 B7 63.20(12) . . . . ? 
B5 B9 B10 B7 100.76(10) . . . . ? 
B8 B9 B10 B7 -37.37(9) . . . . ? 
C13 B9 B10 B5 -99.68(10) . . . . ? 
B1 B9 B10 B5 -37.57(9) . . . . ? 
B8 B9 B10 B5 -138.13(10) . . . . ? 
B2 B6 B10 B8 -63.17(12) . . . . ? 
B3 B6 B10 B8 0.30(13) . . . . ? 
B5 B6 B10 B8 -100.65(10) . . . . ? 
B7 B6 B10 B8 37.47(9) . . . . ? 
B2 B6 B10 B9 0.32(13) . . . . ? 
B3 B6 B10 B9 63.78(12) . . . . ? 
B5 B6 B10 B9 -37.16(9) . . . . ? 
B7 B6 B10 B9 100.96(10) . . . . ? 
B2 B6 B10 B7 -100.64(10) . . . . ? 
B3 B6 B10 B7 -37.18(9) . . . . ? 
B5 B6 B10 B7 -138.12(10) . . . . ? 
B2 B6 B10 B5 37.48(9) . . . . ? 
B3 B6 B10 B5 100.94(10) . . . . ? 
B7 B6 B10 B5 138.12(10) . . . . ? 
B4 B7 B10 B8 -37.33(9) . . . . ? 
B3 B7 B10 B8 -100.60(10) . . . . ? 
B6 B7 B10 B8 -137.92(10) . . . . ? 
B4 B7 B10 B9 0.20(13) . . . . ? 
B3 B7 B10 B9 -63.07(12) . . . . ? 
B8 B7 B10 B9 37.53(9) . . . . ? 
B6 B7 B10 B9 -100.40(10) . . . . ? 
B4 B7 B10 B6 100.59(10) . . . . ? 
B3 B7 B10 B6 37.33(9) . . . . ? 
B8 B7 B10 B6 137.92(10) . . . . ? 
B4 B7 B10 B5 63.22(12) . . . . ? 
B3 B7 B10 B5 -0.05(13) . . . . ? 
B8 B7 B10 B5 100.55(10) . . . . ? 
B6 B7 B10 B5 -37.37(9) . . . . ? 
B1 B5 B10 B8 0.15(13) . . . . ? 
B2 B5 B10 B8 63.42(12) . . . . ? 
B9 B5 B10 B8 -37.45(9) . . . . ? 
B6 B5 B10 B8 100.68(10) . . . . ? 
B1 B5 B10 B9 37.60(9) . . . . ? 
B2 B5 B10 B9 100.87(10) . . . . ? 
B6 B5 B10 B9 138.13(10) . . . . ? 
B1 B5 B10 B6 -100.53(10) . . . . ? 
B2 B5 B10 B6 -37.26(9) . . . . ? 
B9 B5 B10 B6 -138.13(10) . . . . ? 
B1 B5 B10 B7 -63.03(12) . . . . ? 
B2 B5 B10 B7 0.24(13) . . . . ? 
B9 B5 B10 B7 -100.63(10) . . . . ? 
B6 B5 B10 B7 37.50(9) . . . . ? 
 
_diffrn_measured_fraction_theta_max    0.984 
_diffrn_reflns_theta_full              25.0 
_diffrn_measured_fraction_theta_full   0.999 
_refine_diff_density_max    0.42
_refine_diff_density_min   -0.27 
_refine_diff_density_rms    0.055 
# END OF CIF for Compound14
#===END
